# Supplementary material for: A thorough review of the May 5, 1990 earthquake (southern Italy): constraints from macroseismology and insights from hydrology
Source: Copernicus journal article supplement (doi:10.5194/egusphere-2025-5343), 2025-11-07
Supplement: Supplementary file 1 [file Table S1.xlsx]

## Sheet: Table S1
List of the new intensity values assessed in this study.
N	PlaceID	PlaceName	Lat	Lon	Int TERAL [MCS]	Int BMING [MCS]	Int This Study [MCS]	Int This Study [EMS-98]
1	IT_63184	Pietragalla	40.747	15.881	7	6-7	6-7	6-7
2	IT_62944	Cancellara	40.731	15.923	6-7	7	6-7	6
3	IT_62843	Acerenza	40.796	15.94	6-7	6-7	6-7	6
5	IT_62856	Avigliano	40.73	15.717	6-7	6-7	6	6
6	IT_63343	Tolve	40.696	16.019	6	6-7	6	6
8	IT_63353	Vaglio Basilicata	40.666	15.921	6	6-7	6	5-6
15	IT_63286	Ruoti	40.717	15.68	6	6-7	6	5
7	IT_62937	Brindisi Montagna	40.609	15.939	6	6	6	6
16	IT_63228	Potenza	40.638	15.802	6	6	6	5
22	IT_63340	Tito	40.582	15.675	6	6	5-6	5-6
23	IT_63200	Pignola	40.573	15.787	6	6	5-6	5-6
37	IT_63178	Oppido Lucano	40.764	15.993	6	6	5-6	5
38	IT_63004	Filiano	40.809	15.708	6	6	5-6	5
76	IT_62873	Castel Lagopesole	40.805	15.734	6	6	5	5
39	IT_63260	Rapolla	40.976	15.675		7	5-6	5
40	IT_63159	Missanello	40.281	16.166		7	5-6	5
41	IT_61809	Sacco	40.378	15.377		7	5-6	5
899	IT_61636	Nocera Superiore	40.743	14.673		7	NC	NC
900	IT_61409	Castiglione del Genovesi	40.725	14.849		7	NC	NC
901	IT_59698	Paupisi	41.195	14.666		7	NC	NC
4	IT_63352	Trivigno	40.58	15.99		6-7	6-7	6
9	IT_62845	Anzi	40.516	15.924		6-7	6	5-6
10	IT_61864	Salvitelle	40.591	15.46		6-7	6	5-6
24	IT_63331	Savoia di Lucania	40.569	15.551		6-7	5-6	5-6
25	IT_63322	Sant'Angelo le Fratte	40.545	15.559		6-7	5-6	5-6
26	IT_61945	Sassano	40.336	15.561		6-7	5-6	5-6
27	IT_61228	Atena Lucana	40.454	15.553		6-7	5-6	5-6
42	IT_63421	Grottole	40.6	16.385		6-7	5-6	5
43	IT_63403	Cirigliano	40.392	16.172		6-7	5-6	5
44	IT_61969	Serre	40.582	15.185		6-7	5-6	5
45	IT_61615	Monte San Giacomo	40.342	15.542		6-7	5-6	5
46	IT_61262	Bellosguardo	40.422	15.313		6-7	5-6	5
47	IT_61177	Zungoli	41.123	15.203		6-7	5-6	5
48	IT_61070	Scampitella	41.093	15.3		6-7	5-6	5
49	IT_60671	Castelfranci	40.931	15.043		6-7	5-6	5
50	IT_59826	San Martino Sannita	41.065	14.837		6-7	5-6	5
77	IT_63500	Valsinni	40.169	16.443		6-7	5	5
78	IT_63426	Matera	40.667	16.611		6-7	5	5
79	IT_61240	Baronissi	40.746	14.77		6-7	5	5
80	IT_60070	Frattamaggiore	40.941	14.272		6-7	5	5
81	IT_59463	Buonalbergo	41.222	14.98		6-7	5	5
213	IT_59692	Pannarano	41.01	14.704		6-7	4-5	4-5
902	IT_64360	San Lorenzo Bellizzi	39.888	16.329		6-7	NC	NC
903	IT_63439	Scanzano Jonico	40.248	16.699		6-7	NC	NC
904	IT_61686	Pagani	40.744	14.616		6-7	NC	NC
905	IT_61198	Altavilla Silentina	40.53	15.131		6-7	NC	NC
906	IT_59489	Castelfranco in Miscano	41.297	15.085		6-7	NC	NC
907	IT_59315	Sparanise	41.189	14.097		6-7	NC	NC
908	IT_59241	San Marcellino	40.987	14.174		6-7	NC	NC
909	IT_58563	Venafro	41.486	14.044		6-7	NC	NC
11	IT_63291	San Chirico Nuovo	40.677	16.082		6	6	5-6
12	IT_62907	Baragiano	40.681	15.591		6	6	5-6
13	IT_61875	San Gregorio Magno	40.656	15.404		6	6	5-6
14	IT_60574	Andretta	40.932	15.323		6	6	5-6
17	IT_62918	Bella	40.759	15.538		6	6	5
18	IT_62915	Barile	40.945	15.673		6	6	5
28	IT_63326	Sasso di Castalda	40.488	15.677		6	5-6	5-6
29	IT_63268	Ripacandida	40.91	15.723		6	5-6	5-6
30	IT_63266	Rionero in Vulture	40.924	15.674		6	5-6	5-6
31	IT_63182	Picerno	40.64	15.638		6	5-6	5-6
32	IT_63057	Laurenzana	40.459	15.971		6	5-6	5-6
33	IT_62083	Anzano di Puglia	41.12	15.288		6	5-6	5-6
34	IT_61922	Sanza	40.242	15.551		6	5-6	5-6
35	IT_61903	Sant'Arsenio	40.469	15.481		6	5-6	5-6
51	IT_63492	Tricarico	40.622	16.144		6	5-6	5
52	IT_63417	Garaguso	40.548	16.227		6	5-6	5
53	IT_63413	Ferrandina	40.495	16.457		6	5-6	5
54	IT_63402	Calciano	40.588	16.193		6	5-6	5
55	IT_63355	Venosa	40.961	15.818		6	5-6	5
56	IT_63303	San Fele	40.819	15.541		6	5-6	5
57	IT_63263	Rapone	40.846	15.501		6	5-6	5
58	IT_63196	Pietrapertosa	40.517	16.062		6	5-6	5
59	IT_63156	Melfi	40.994	15.653		6	5-6	5
60	IT_63112	Marsico Nuovo	40.421	15.735		6	5-6	5
61	IT_63029	Genzano di Lucania	40.849	16.032		6	5-6	5
62	IT_63028	Gallicchio	40.288	16.139		6	5-6	5
63	IT_62904	Banzi	40.861	16.014		6	5-6	5
64	IT_62903	Balvano	40.65	15.512		6	5-6	5
65	IT_61892	San Pietro al Tanagro	40.455	15.482		6	5-6	5
66	IT_61471	Contursi Terme	40.649	15.238		6	5-6	5
67	IT_61468	Controne	40.509	15.205		6	5-6	5
68	IT_61248	Battipaglia	40.607	14.983		6	5-6	5
69	IT_61175	Villanova del Battista	41.115	15.159		6	5-6	5
70	IT_61138	Trevico	41.048	15.234		6	5-6	5
82	IT_63498	Tursi	40.247	16.471		6	5	5
83	IT_63486	Stigliano	40.403	16.229		6	5	5
84	IT_63436	Montalbano Jonico	40.29	16.567		6	5	5
85	IT_63325	Sarconi	40.247	15.89		6	5	5
86	IT_63139	Paterno	40.377	15.732		6	5	5
87	IT_62952	Castelmezzano	40.53	16.047		6	5	5
88	IT_62943	Campomaggiore	40.565	16.072		6	5	5
89	IT_62848	Atella	40.877	15.653		6	5	5
90	IT_62245	Sant'Agata di Puglia	41.15	15.38		6	5	5
91	IT_62057	Valle dell'Angelo	40.343	15.369		6	5	5
92	IT_61977	Siano	40.801	14.693		6	5	5
93	IT_61914	Sant'Egidio del Monte Albino	40.732	14.601		6	5	5
94	IT_61869	San Cipriano Picentino	40.719	14.871		6	5	5
95	IT_61833	Sala Consilina	40.398	15.596		6	5	5
96	IT_61708	Perito	40.298	15.147		6	5	5
97	IT_61625	Montesano sulla Marcellana	40.275	15.702		6	5	5
98	IT_61412	Cava de' Tirreni	40.7	14.706		6	5	5
99	IT_61278	Calvanico	40.774	14.828		6	5	5
100	IT_61091	Solofra	40.829	14.849		6	5	5
101	IT_61003	San Potito Ultra	40.927	14.871		6	5	5
102	IT_60942	Quadrelle	40.949	14.64		6	5	5
103	IT_60764	Lapio	40.981	14.949		6	5	5
104	IT_60658	Calitri	40.9	15.435		6	5	5
105	IT_60119	Liveri	40.903	14.567		6	5	5
106	IT_59612	Forchia	41.03	14.537		6	5	5
107	IT_59610	Foiano di Val Fortore	41.352	14.98		6	5	5
108	IT_59548	Circello	41.357	14.808		6	5	5
109	IT_59466	Calvi	41.072	14.866		6	5	5
110	IT_59421	Apollosa	41.093	14.701		6	5	5
111	IT_59398	Apice Nuovo	41.119	14.914		6	5	5
214	IT_59986	Boscotrecase	40.775	14.467		6	4-5	4-5
416	IT_58921	Capodrise	41.042	14.3		6	4	4
910	IT_61959	Scafati	40.749	14.527		6	NC	NC
911	IT_60111	Lettere (Piazza Roma)	40.704	14.545		6	NC	NC
912	IT_59844	Santa Croce del Sannio	41.387	14.732		6	NC	NC
913	IT_59841	San Salvatore Telesino	41.236	14.499		6	NC	NC
914	IT_59816	San Lorenzo Maggiore	41.251	14.626		6	NC	NC
36	IT_62929	Brienza	40.478	15.629		5-6	5-6	5-6
71	IT_63419	Gorgoglione	40.393	16.145		5-6	5-6	5
72	IT_63327	Satriano di Lucania	40.543	15.639		5-6	5-6	5
73	IT_63161	Moliterno	40.24	15.868		5-6	5-6	5
74	IT_63026	Forenza	40.859	15.855		5-6	5-6	5
75	IT_62940	Calvello	40.475	15.849		5-6	5-6	5
112	IT_63445	Oliveto Lucano	40.534	16.185		5-6	5	5
113	IT_63422	Irsina	40.744	16.242		5-6	5	5
114	IT_63420	Grassano	40.632	16.28		5-6	5	5
115	IT_63346	Tramutola	40.315	15.79		5-6	5	5
116	IT_63324	Sant'Arcangelo	40.246	16.274		5-6	5	5
117	IT_63292	San Chirico Raparo	40.19	16.075		5-6	5	5
118	IT_63290	Ruvo del Monte	40.848	15.54		5-6	5	5
119	IT_63278	Roccanova	40.213	16.205		5-6	5	5
120	IT_63180	Pescopagano	40.836	15.399		5-6	5	5
121	IT_63179	Palazzo San Gervasio	40.93	15.986		5-6	5	5
122	IT_63169	Muro Lucano	40.753	15.486		5-6	5	5
123	IT_63141	Marsicovetere	40.376	15.824		5-6	5	5
124	IT_63031	Grumento Nova	40.285	15.891		5-6	5	5
125	IT_62980	Corleto Perticara	40.383	16.041		5-6	5	5
126	IT_62946	Castelgrande	40.785	15.431		5-6	5	5
127	IT_62844	Albano di Lucania	40.584	16.036		5-6	5	5
128	IT_62840	Abriola	40.507	15.813		5-6	5	5
129	IT_62448	Ginosa	40.578	16.758		5-6	5	5
130	IT_62419	Spinazzola	40.968	16.089		5-6	5	5
131	IT_62407	Poggiorsini	40.915	16.254		5-6	5	5
132	IT_62340	Gravina in Puglia	40.819	16.42		5-6	5	5
133	IT_62230	Rocchetta Sant'Antonio	41.102	15.46		5-6	5	5
134	IT_62106	Candela	41.136	15.515		5-6	5	5
135	IT_62102	Bovino	41.251	15.342		5-6	5	5
136	IT_62016	Torchiara	40.323	15.052		5-6	5	5
137	IT_62012	Teggiano	40.378	15.54		5-6	5	5
138	IT_61994	Stio	40.309	15.252		5-6	5	5
139	IT_61923	Sapri	40.075	15.631		5-6	5	5
140	IT_61902	Sant'Angelo a Fasanella	40.456	15.344		5-6	5	5
141	IT_61838	Salerno	40.68	14.76		5-6	5	5
142	IT_61721	Polla	40.514	15.494		5-6	5	5
143	IT_61711	Pertosa	40.542	15.45		5-6	5	5
144	IT_61654	Oliveto Citra	40.691	15.232		5-6	5	5
145	IT_61539	Laurino	40.336	15.336		5-6	5	5
146	IT_61492	Fisciano	40.77	14.799		5-6	5	5
147	IT_61407	Castel San Lorenzo	40.416	15.231		5-6	5	5
148	IT_61402	Castelnuovo di Conza	40.815	15.32		5-6	5	5
149	IT_61277	Caggiano	40.568	15.489		5-6	5	5
150	IT_61231	Auletta	40.559	15.426		5-6	5	5
151	IT_61062	Savignano Irpino	41.228	15.181		5-6	5	5
152	IT_60894	Morra De Sanctis	40.928	15.244		5-6	5	5
153	IT_60763	Lacedonia	41.05	15.424		5-6	5	5
154	IT_60668	Casalbore	41.232	15.012		5-6	5	5
155	IT_60576	Aquilonia	40.986	15.477		5-6	5	5
156	IT_60135	Mariglianella	40.927	14.438		5-6	5	5
157	IT_59615	Fragneto l'Abate	41.259	14.785		5-6	5	5
158	IT_59474	Campoli del Monte Taburno	41.131	14.646		5-6	5	5
215	IT_64145	Montalto Uffugo	39.405	16.158		5-6	4-5	4-5
216	IT_63442	Montescaglioso	40.552	16.667		5-6	4-5	4-5
217	IT_62984	Episcopia	40.072	16.099		5-6	4-5	4-5
218	IT_61884	San Marzano sul Sarno	40.774	14.589		5-6	4-5	4-5
219	IT_61704	Perdifumo	40.266	15.017		5-6	4-5	4-5
220	IT_61301	Campagna	40.665	15.107		5-6	4-5	4-5
221	IT_61215	Aquara	40.443	15.254		5-6	4-5	4-5
222	IT_60927	Pietrastornina	40.991	14.728		5-6	4-5	4-5
223	IT_60895	Moschiano	40.874	14.659		5-6	4-5	4-5
224	IT_59693	Paolisi	41.036	14.58		5-6	4-5	4-5
225	IT_58924	Capua	41.106	14.214		5-6	4-5	4-5
417	IT_72529	Cerreta-Cognola	40.245	15.659		5-6	4	4
418	IT_63465	Pomarico	40.514	16.549		5-6	4	4
419	IT_63405	Craco Peschiera	40.357	16.495		5-6	4	4
420	IT_63034	Lagonegro	40.124	15.764		5-6	4	4
421	IT_62945	Carbone	40.14	16.088		5-6	4	4
422	IT_62846	Armento	40.306	16.066		5-6	4	4
423	IT_62310	Canosa di Puglia	41.223	16.067		5-6	4	4
424	IT_62235	San Giovanni Rotondo	41.706	15.728		5-6	4	4
425	IT_62120	Celle di San Vito	41.326	15.181		5-6	4	4
426	IT_62095	Biccari	41.397	15.194		5-6	4	4
427	IT_62069	Vietri sul Mare	40.67	14.729		5-6	4	4
428	IT_61658	Omignano	40.249	15.084		5-6	4	4
429	IT_61648	Olevano sul Tusciano (Ariano)	40.657	15.023		5-6	4	4
430	IT_61639	Novi Velia	40.224	15.286		5-6	4	4
431	IT_61627	Morigerati	40.139	15.555		5-6	4	4
432	IT_61596	Montecorvino (Pugliano)	40.679	14.946		5-6	4	4
433	IT_61543	Lustra	40.287	15.07		5-6	4	4
434	IT_61533	Laureana Cilento	40.3	15.039		5-6	4	4
435	IT_61529	Giungano	40.394	15.107		5-6	4	4
436	IT_61400	Castelnuovo Cilento	40.218	15.178		5-6	4	4
437	IT_61391	Castellabate	40.279	14.953		5-6	4	4
438	IT_61377	Caselle in Pittari	40.172	15.546		5-6	4	4
439	IT_61371	Casal Velino	40.188	15.11		5-6	4	4
440	IT_61264	Bracigliano	40.822	14.712		5-6	4	4
441	IT_61212	Angri	40.738	14.571		5-6	4	4
442	IT_61195	Alfano	40.177	15.426		5-6	4	4
443	IT_61190	Albanella	40.479	15.116		5-6	4	4
444	IT_61157	Vallesaccarda	41.064	15.253		5-6	4	4
445	IT_60910	Petruro Irpino	41.031	14.796		5-6	4	4
446	IT_60729	Grottaminarda	41.069	15.058		5-6	4	4
447	IT_60561	Altavilla Irpina	41.007	14.779		5-6	4	4
448	IT_60542	Villaricca	40.921	14.194		5-6	4	4
449	IT_60310	Pompei	40.749	14.501		5-6	4	4
450	IT_60214	Nola	40.926	14.529		5-6	4	4
451	IT_60090	Grumo Nevano	40.938	14.261		5-6	4	4
452	IT_60016	Casandrino	40.935	14.249		5-6	4	4
453	IT_59838	San Nicola Manfredi	41.071	14.825		5-6	4	4
454	IT_59800	San Giorgio la Molara	41.27	14.919		5-6	4	4
455	IT_59713	Ponte	41.214	14.696		5-6	4	4
456	IT_59682	Paduli	41.164	14.88		5-6	4	4
457	IT_59635	Moiano	41.08	14.544		5-6	4	4
458	IT_59428	Arpaise	41.03	14.744		5-6	4	4
459	IT_59384	Airola	41.06	14.554		5-6	4	4
460	IT_59216	Roccaromana	41.273	14.223		5-6	4	4
915	IT_64395	San Nicola Arcella	39.847	15.795		5-6	NC	NC
916	IT_64182	Papasidero	39.871	15.906		5-6	NC	NC
917	IT_59560	Colle Sannita	41.364	14.833		5-6	NC	NC
159	IT_63470	San Mauro Forte	40.486	16.25		5	5	5
160	IT_63468	Salandra	40.526	16.317		5	5	5
161	IT_63466	Rotondella	40.171	16.526		5	5	5
162	IT_63450	Pisticci	40.39	16.557		5	5	5
163	IT_63443	Nova Siri	40.148	16.54		5	5	5
164	IT_63392	Accettura	40.492	16.158		5	5	5
165	IT_63391	Viggiano	40.339	15.9		5	5	5
166	IT_63356	Vietri di Potenza	40.599	15.509		5	5	5
167	IT_63306	San Paolo Albanese	40.035	16.335		5	5	5
168	IT_63273	Rivello	40.077	15.757		5	5	5
169	IT_63166	Montemurro	40.297	15.991		5	5	5
170	IT_63084	Lavello	41.046	15.795		5	5	5
171	IT_63056	Latronico	40.087	16.011		5	5	5
172	IT_62970	Cersosimo	40.045	16.349		5	5	5
173	IT_62967	Castronuovo di Sant'Andrea	40.189	16.186		5	5	5
174	IT_62953	Castelsaraceno	40.163	15.992		5	5	5
175	IT_62254	Troia	41.361	15.309		5	5	5
176	IT_62251	Trinitapoli	41.356	16.088		5	5	5
177	IT_62224	Panni	41.222	15.275		5	5	5
178	IT_62205	Monteleone di Puglia	41.166	15.259		5	5	5
179	IT_62162	Lesina	41.864	15.353		5	5	5
180	IT_62092	Ascoli Satriano	41.205	15.561		5	5	5
181	IT_62064	Valva	40.738	15.27		5	5	5
182	IT_62045	Tramonti (Polvica)	40.694	14.642		5	5	5
183	IT_62019	Torre Orsaia	40.132	15.474		5	5	5
184	IT_61893	San Rufo	40.434	15.464		5	5	5
185	IT_61806	Roscigno (Nuovo)	40.399	15.346		5	5	5
186	IT_61752	Postiglione	40.558	15.232		5	5	5
187	IT_61719	Pisciotta	40.107	15.234		5	5	5
188	IT_61680	Padula	40.34	15.659		5	5	5
189	IT_61645	Ogliastro Cilento	40.351	15.044		5	5	5
190	IT_61569	Mercato San Severino	40.785	14.759		5	5	5
191	IT_61486	Eboli	40.617	15.055		5	5	5
192	IT_61466	Colliano	40.726	15.29		5	5	5
193	IT_61274	Buccino	40.633	15.376		5	5	5
194	IT_61178	Acerno	40.735	15.058		5	5	5
195	IT_61153	Vallata	41.034	15.253		5	5	5
196	IT_61112	Teora	40.854	15.255		5	5	5
197	IT_61072	Senerchia	40.74	15.203		5	5	5
198	IT_61034	Sant'Angelo dei Lombardi	40.927	15.177		5	5	5
199	IT_61007	Sant'Andrea di Conza	40.843	15.37		5	5	5
200	IT_61002	San Nicola Baronia	41.058	15.2		5	5	5
201	IT_60950	Roccabascerana	41.017	14.717		5	5	5
202	IT_60935	Pratola Serra	40.986	14.852		5	5	5
203	IT_60723	Greci	41.25	15.169		5	5	5
204	IT_60691	Conza della Campania	40.87	15.331		5	5	5
205	IT_60661	Caposele	40.813	15.225		5	5	5
206	IT_60651	Bonito	41.102	15.004		5	5	5
207	IT_59939	Afragola	40.921	14.309		5	5	5
212	IT_61634	Nocera Inferiore	40.743	14.642		5	5	4-5
226	IT_63351	Trecchina	40.026	15.777		5	4-5	4-5
227	IT_63176	Noepoli	40.087	16.329		5	4-5	4-5
228	IT_63172	Nemoli	40.067	15.8		5	4-5	4-5
229	IT_62412	Putignano	40.849	17.122		5	4-5	4-5
230	IT_62405	Noicattaro	41.032	16.989		5	4-5	4-5
231	IT_62313	Casamassima	40.954	16.919		5	4-5	4-5
232	IT_62263	Acquaviva delle Fonti	40.896	16.843		5	4-5	4-5
233	IT_62194	Lucera	41.508	15.335		5	4-5	4-5
234	IT_62126	Cerignola	41.264	15.898		5	4-5	4-5
235	IT_62085	Apricena	41.784	15.444		5	4-5	4-5
236	IT_62060	Vallo della Lucania	40.229	15.267		5	4-5	4-5
237	IT_61986	Sicignano degli Alburni	40.558	15.309		5	4-5	4-5
238	IT_61837	Salento	40.249	15.188		5	4-5	4-5
239	IT_61808	Rutino	40.298	15.076		5	4-5	4-5
240	IT_61713	Piaggine	40.343	15.378		5	4-5	4-5
241	IT_61578	Montano Antilia	40.161	15.366		5	4-5	4-5
242	IT_61542	Laviano	40.784	15.305		5	4-5	4-5
243	IT_61487	Felitto	40.374	15.241		5	4-5	4-5
244	IT_61476	Cuccaro Vetere	40.159	15.309		5	4-5	4-5
245	IT_61462	Cicerale	40.342	15.132		5	4-5	4-5
246	IT_61350	Casaletto Spartano	40.15	15.62		5	4-5	4-5
247	IT_61319	Foce del Sele	40.478	14.95		5	4-5	4-5
248	IT_61279	Camerota	40.029	15.374		5	4-5	4-5
249	IT_61176	Volturara Irpina	40.878	14.916		5	4-5	4-5
250	IT_60974	San Mango sul Calore	40.961	14.975		5	4-5	4-5
251	IT_60884	Montoro (Torchiati)	40.817	14.8		5	4-5	4-5
252	IT_60867	Montemiletto	41.011	14.909		5	4-5	4-5
253	IT_60851	Montefusco	41.037	14.855		5	4-5	4-5
254	IT_60803	Mirabella Eclano	41.042	14.996		5	4-5	4-5
255	IT_60621	Atripalda	40.919	14.835		5	4-5	4-5
256	IT_60545	Visciano	40.925	14.583		5	4-5	4-5
257	IT_60367	San Gennaro Vesuviano	40.861	14.527		5	4-5	4-5
258	IT_60137	Marigliano	40.924	14.458		5	4-5	4-5
259	IT_60081	Santa Maria la Carità	40.72	14.512		5	4-5	4-5
260	IT_59892	Sant'Agata de' Goti	41.089	14.504		5	4-5	4-5
261	IT_59478	Casalduni	41.26	14.695		5	4-5	4-5
461	IT_64331	San Demetrio Corone	39.568	16.362		5	4	4
462	IT_64170	Nocara	40.099	16.483		5	4	4
463	IT_63556	Altomonte	39.698	16.131		5	4	4
464	IT_63461	Policoro	40.209	16.676		5	4	4
465	IT_63399	Bernalda	40.407	16.688		5	4	4
466	IT_62490	Palagiano	40.579	17.037		5	4	4
467	IT_62488	Palagianello	40.61	16.974		5	4	4
468	IT_62422	Toritto	40.997	16.68		5	4	4
469	IT_62359	Mola di Bari	41.058	17.088		5	4	4
470	IT_62022	Tortorella	40.142	15.607		5	4	4
471	IT_61935	Sarno	40.814	14.621		5	4	4
472	IT_61785	Roccadaspide	40.426	15.191		5	4	4
473	IT_61660	Orria	40.3	15.172		5	4	4
474	IT_61614	Monteforte Cilento	40.363	15.194		5	4	4
475	IT_61549	Magliano Vetere	40.347	15.236		5	4	4
476	IT_61531	Ispani	40.087	15.558		5	4	4
477	IT_61509	Giffoni Sei Casali (Capitignano)	40.718	14.904		5	4	4
478	IT_61403	Castel San Giorgio	40.78	14.698		5	4	4
479	IT_61229	Atrani	40.636	14.609		5	4	4
480	IT_60840	Monteforte Irpino	40.892	14.711		5	4	4
481	IT_60534	Vico Equense	40.663	14.426		5	4	4
482	IT_60272	Poggiomarino	40.798	14.541		5	4	4
483	IT_60083	Gragnano	40.689	14.52		5	4	4
484	IT_60057	Comiziano	40.952	14.551		5	4	4
485	IT_60031	Castellammare di Stabia	40.7	14.486		5	4	4
486	IT_59985	Boscoreale	40.773	14.477		5	4	4
487	IT_59915	Tocco Caudio	41.124	14.627		5	4	4
488	IT_59764	Puglianello	41.223	14.45		5	4	4
489	IT_59648	Montesarchio	41.064	14.64		5	4	4
490	IT_59386	Amorosi	41.202	14.462		5	4	4
491	IT_59383	Vitulazio	41.163	14.217		5	4	4
492	IT_59372	Vairano-Patenora	41.333	14.132		5	4	4
493	IT_59171	Pratella	41.405	14.178		5	4	4
494	IT_59131	Orta di Atella	40.964	14.269		5	4	4
495	IT_59081	Grazzanise	41.091	14.103		5	4	4
496	IT_59076	Gioia Sannitica	41.299	14.445		5	4	4
497	IT_58931	Carinola	41.188	13.978		5	4	4
498	IT_58868	Alvignano	41.245	14.338		5	4	4
613	IT_62951	Castelluccio Superiore	40.01	15.975		5	3-4	3-4
614	IT_62283	Altamura	40.827	16.553		5	3-4	3-4
615	IT_62226	Pietramontecorvino	41.542	15.128		5	3-4	3-4
616	IT_60019	Casola di Napoli	40.694	14.53		5	3-4	3-4
617	IT_59434	Baselice	41.393	14.973		5	3-4	3-4
918	IT_58452	Pettoranello del Molise	41.573	14.278		5	NC	NC
208	IT_63148	Maschito	40.909	15.831		4-5	5	5
209	IT_62076	Accadia	41.158	15.334		4-5	5	5
262	IT_64496	Verbicaro	39.756	15.912		4-5	4-5	4-5
263	IT_64410	San Sosti	39.66	16.028		4-5	4-5	4-5
264	IT_64171	Oriolo	40.052	16.447		4-5	4-5	4-5
265	IT_64163	Morano Calabro	39.844	16.136		4-5	4-5	4-5
266	IT_64042	Laino Castello	39.937	15.977		4-5	4-5	4-5
267	IT_63549	Alessandria del Carretto	39.958	16.38		4-5	4-5	4-5
268	IT_63469	San Giorgio Lucano	40.112	16.388		4-5	4-5	4-5
269	IT_63395	Aliano	40.313	16.23		4-5	4-5	4-5
270	IT_63361	Viggianello	39.973	16.087		4-5	4-5	4-5
271	IT_63336	Terranova di Pollino	39.977	16.297		4-5	4-5	4-5
272	IT_63334	Teana	40.126	16.154		4-5	4-5	4-5
273	IT_63332	Senise	40.144	16.289		4-5	4-5	4-5
274	IT_63315	San Severino Lucano	40.021	16.138		4-5	4-5	4-5
275	IT_63293	San Costantino Albanese	40.036	16.305		4-5	4-5	4-5
276	IT_63281	Rotonda	39.952	16.039		4-5	4-5	4-5
277	IT_63165	Montemilone	41.032	15.972		4-5	4-5	4-5
278	IT_63093	Maratea	39.993	15.721		4-5	4-5	4-5
279	IT_63060	Lauria	40.046	15.837		4-5	4-5	4-5
280	IT_62989	Fardella	40.114	16.169		4-5	4-5	4-5
281	IT_62976	Chiaromonte	40.124	16.213		4-5	4-5	4-5
282	IT_62947	Castelluccio Inferiore	40.002	15.981		4-5	4-5	4-5
283	IT_62822	Tuglie	40.072	18.098		4-5	4-5	4-5
284	IT_62645	Torre Santa Susanna	40.465	17.74		4-5	4-5	4-5
285	IT_62580	Francavilla Fontana	40.529	17.583		4-5	4-5	4-5
286	IT_62556	Cisternino	40.741	17.427		4-5	4-5	4-5
287	IT_62547	Ceglie Messapica	40.645	17.517		4-5	4-5	4-5
288	IT_62476	Montemesola	40.562	17.339		4-5	4-5	4-5
289	IT_62457	Laterza	40.625	16.797		4-5	4-5	4-5
290	IT_62424	Trani	41.28	16.418		4-5	4-5	4-5
291	IT_62421	Terlizzi	41.129	16.543		4-5	4-5	4-5
292	IT_62418	Santeramo in Colle	40.794	16.756		4-5	4-5	4-5
293	IT_62414	Rutigliano	41.009	17.005		4-5	4-5	4-5
294	IT_62404	Noci	40.794	17.123		4-5	4-5	4-5
295	IT_62396	Monopoli	40.951	17.296		4-5	4-5	4-5
296	IT_62357	Modugno	41.082	16.782		4-5	4-5	4-5
297	IT_62356	Minervino Murge	41.086	16.079		4-5	4-5	4-5
298	IT_62343	Grumo Appula	41.012	16.708		4-5	4-5	4-5
299	IT_62338	Giovinazzo	41.186	16.673		4-5	4-5	4-5
300	IT_62336	Gioia del Colle	40.798	16.923		4-5	4-5	4-5
301	IT_62333	Corato	41.153	16.411		4-5	4-5	4-5
302	IT_62330	Conversano	40.967	17.114		4-5	4-5	4-5
303	IT_62312	Capurso	41.047	16.921		4-5	4-5	4-5
304	IT_62306	Bitonto	41.108	16.691		4-5	4-5	4-5
305	IT_62301	Barletta	41.319	16.279		4-5	4-5	4-5
306	IT_62294	Bari	41.129	16.869		4-5	4-5	4-5
307	IT_62270	Alberobello	40.784	17.238		4-5	4-5	4-5
308	IT_62250	Torremaggiore	41.689	15.292		4-5	4-5	4-5
309	IT_62248	Stornarella	41.256	15.731		4-5	4-5	4-5
310	IT_62247	Stornara	41.287	15.769		4-5	4-5	4-5
311	IT_62242	San Paolo di Civitate	41.739	15.261		4-5	4-5	4-5
312	IT_62240	San Marco la Catola	41.525	15.006		4-5	4-5	4-5
313	IT_62238	San Marco in Lamis	41.712	15.637		4-5	4-5	4-5
314	IT_62228	Rignano Garganico	41.675	15.587		4-5	4-5	4-5
315	IT_62227	Poggio Imperiale	41.824	15.367		4-5	4-5	4-5
316	IT_62222	Orta Nova	41.327	15.707		4-5	4-5	4-5
317	IT_62219	Orsara di Puglia	41.281	15.266		4-5	4-5	4-5
318	IT_62216	Motta Montecorvino	41.508	15.115		4-5	4-5	4-5
319	IT_62211	Monte Sant'Angelo	41.706	15.959		4-5	4-5	4-5
320	IT_62203	Margherita di Savoia	41.374	16.152		4-5	4-5	4-5
321	IT_62146	Foggia	41.462	15.545		4-5	4-5	4-5
322	IT_62140	Deliceto	41.222	15.386		4-5	4-5	4-5
323	IT_62137	Chieuti	41.844	15.166		4-5	4-5	4-5
324	IT_62117	Castelluccio Valmaggiore	41.341	15.198		4-5	4-5	4-5
325	IT_62116	Castelluccio dei Sauri	41.304	15.477		4-5	4-5	4-5
326	IT_62114	Casalvecchio di Puglia	41.594	15.113		4-5	4-5	4-5
327	IT_62107	Carapelle	41.363	15.692		4-5	4-5	4-5
328	IT_62104	Cagnano Varano	41.826	15.776		4-5	4-5	4-5
329	IT_62017	Torraca	40.11	15.637		4-5	4-5	4-5
330	IT_61974	Sessa Cilento	40.259	15.076		4-5	4-5	4-5
331	IT_61755	Prignano Cilento	40.329	15.07		4-5	4-5	4-5
332	IT_61734	Pontecagnano Faiano (Pontecagnano)	40.646	14.872		4-5	4-5	4-5
333	IT_61700	Pellezzano	40.725	14.758		4-5	4-5	4-5
334	IT_61610	Montecorvino Rovella	40.694	14.977		4-5	4-5	4-5
335	IT_61573	Minori	40.65	14.628		4-5	4-5	4-5
336	IT_61541	Laurito	40.168	15.405		4-5	4-5	4-5
337	IT_61516	Giffoni Valle Piana (Mercato)	40.716	14.943		4-5	4-5	4-5
338	IT_61475	Corleto Monforte	40.436	15.38		4-5	4-5	4-5
339	IT_61474	Corbara	40.722	14.593		4-5	4-5	4-5
340	IT_61446	Centola	40.066	15.312		4-5	4-5	4-5
341	IT_61303	Cannalonga	40.244	15.293		4-5	4-5	4-5
342	IT_61140	Tufo	41.01	14.821		4-5	4-5	4-5
343	IT_61127	Torrioni	41.033	14.812		4-5	4-5	4-5
344	IT_61108	Summonte	40.949	14.747		4-5	4-5	4-5
345	IT_61092	Sorbo Serpico	40.917	14.886		4-5	4-5	4-5
346	IT_61061	Santo Stefano del Sole	40.893	14.869		4-5	4-5	4-5
347	IT_61006	Santa Lucia di Serino	40.87	14.876		4-5	4-5	4-5
348	IT_60906	Paternopoli	40.972	15.032		4-5	4-5	4-5
349	IT_60899	Ospedaletto d'Alpinolo	40.939	14.744		4-5	4-5	4-5
350	IT_60875	Montoro Inferiore-Piano-Parrelle	40.82	14.759		4-5	4-5	4-5
351	IT_60859	Montemarano	40.919	14.997		4-5	4-5	4-5
352	IT_60819	Montecalvo Irpino	41.196	15.034		4-5	4-5	4-5
353	IT_60796	Mercogliano	40.918	14.735		4-5	4-5	4-5
354	IT_60778	Marzano di Nola	40.902	14.583		4-5	4-5	4-5
355	IT_60776	Manocalzati	40.941	14.848		4-5	4-5	4-5
356	IT_60773	Lioni	40.876	15.187		4-5	4-5	4-5
357	IT_60769	Lauro	40.879	14.633		4-5	4-5	4-5
358	IT_60719	Frigento	41.012	15.099		4-5	4-5	4-5
359	IT_60707	Forino	40.861	14.738		4-5	4-5	4-5
360	IT_60703	Flumeri	41.078	15.148		4-5	4-5	4-5
361	IT_60694	Domicella	40.879	14.587		4-5	4-5	4-5
362	IT_60689	Contrada	40.867	14.775		4-5	4-5	4-5
363	IT_60688	Chiusano di San Domenico	40.932	14.917		4-5	4-5	4-5
364	IT_60670	Castel Baronia	41.049	15.189		4-5	4-5	4-5
365	IT_60644	Bisaccia	41.014	15.375		4-5	4-5	4-5
366	IT_60634	Bagnoli Irpino	40.83	15.07		4-5	4-5	4-5
367	IT_60627	Avellino	40.914	14.793		4-5	4-5	4-5
368	IT_60555	Aiello del Sabato	40.887	14.819		4-5	4-5	4-5
369	IT_60434	Scisciano	40.916	14.485		4-5	4-5	4-5
370	IT_60413	Sant'Antonio Abate	40.722	14.543		4-5	4-5	4-5
371	IT_60404	Sant'Anastasia	40.867	14.403		4-5	4-5	4-5
372	IT_60386	San Paolo Bel Sito	40.915	14.547		4-5	4-5	4-5
373	IT_60374	San Giorgio a Cremano	40.831	14.339		4-5	4-5	4-5
374	IT_60360	Roccarainola	40.972	14.561		4-5	4-5	4-5
375	IT_60318	Portici	40.819	14.342		4-5	4-5	4-5
376	IT_60181	Mugnano di Napoli	40.908	14.207		4-5	4-5	4-5
377	IT_60180	Monte di Procida	40.795	14.051		4-5	4-5	4-5
378	IT_60151	Massa Lubrense	40.61	14.343		4-5	4-5	4-5
379	IT_60074	Giugliano in Campania	40.928	14.201		4-5	4-5	4-5
380	IT_60059	Ercolano	40.808	14.349		4-5	4-5	4-5
381	IT_60053	Cicciano	40.962	14.538		4-5	4-5	4-5
382	IT_60037	Castello di Cisterna	40.916	14.41		4-5	4-5	4-5
383	IT_60025	Casoria	40.905	14.29		4-5	4-5	4-5
384	IT_60005	Carbonara di Nola	40.875	14.578		4-5	4-5	4-5
385	IT_59944	Agerola (Pianillo)	40.638	14.543		4-5	4-5	4-5
386	IT_59932	Vitulano	41.174	14.646		4-5	4-5	4-5
387	IT_59910	Sant'Angelo a Cupolo	41.069	14.804		4-5	4-5	4-5
388	IT_59812	San Leucio del Sannio	41.073	14.758		4-5	4-5	4-5
389	IT_59770	San Bartolomeo in Galdo	41.411	15.016		4-5	4-5	4-5
390	IT_59729	Pontelandolfo	41.286	14.693		4-5	4-5	4-5
391	IT_59532	Ceppaloni	41.045	14.76		4-5	4-5	4-5
392	IT_59517	Castelvenere	41.234	14.546		4-5	4-5	4-5
393	IT_59460	Bucciano	41.075	14.573		4-5	4-5	4-5
394	IT_59361	Tora e Piccilli (Tora)	41.338	14.023		4-5	4-5	4-5
395	IT_59255	Santa Maria a Vico	41.028	14.463		4-5	4-5	4-5
396	IT_59247	San Potito Sannitico	41.337	14.393		4-5	4-5	4-5
397	IT_59237	San Felice a Cancello (San Felice)	41.012	14.485		4-5	4-5	4-5
398	IT_59175	Recale	41.056	14.303		4-5	4-5	4-5
399	IT_59165	Portico di Caserta	41.056	14.28		4-5	4-5	4-5
400	IT_59136	Piana di Monte Verna	41.168	14.333		4-5	4-5	4-5
401	IT_59128	Mignano Monte Lungo	41.405	13.983		4-5	4-5	4-5
402	IT_59033	Gallo Matese	41.464	14.227		4-5	4-5	4-5
403	IT_58988	Cervino	41.04	14.422		4-5	4-5	4-5
404	IT_58946	Casaluce	41.002	14.198		4-5	4-5	4-5
405	IT_58917	Camigliano	41.181	14.212		4-5	4-5	4-5
406	IT_58895	Bellona	41.161	14.233		4-5	4-5	4-5
407	IT_58878	Aversa	40.974	14.207		4-5	4-5	4-5
408	IT_58854	Toro	41.57	14.766		4-5	4-5	4-5
409	IT_58780	Portocannone	41.915	15.008		4-5	4-5	4-5
410	IT_58557	Vastogirardi	41.774	14.26		4-5	4-5	4-5
411	IT_58494	Roccasicura	41.697	14.233		4-5	4-5	4-5
412	IT_58149	Scerni	42.112	14.57		4-5	4-5	4-5
413	IT_58047	Roccamontepiano (San Rocco)	42.243	14.128		4-5	4-5	4-5
414	IT_58018	Pollutri	42.137	14.594		4-5	4-5	4-5
499	IT_63404	Colobraro	40.188	16.425		4-5	4	4
500	IT_61275	Buonabitacolo	40.27	15.621		4-5	4	4
501	IT_60654	Calabritto	40.786	15.218		4-5	4	4
612	IT_60269	Pimonte (Piazza-Tralia)	40.674	14.514		4-5	F	F
502	IT_65098	Soveria Simeri	38.946	16.679		4	4	4
503	IT_64991	Roccabernarda	39.133	16.868		4	4	4
504	IT_64906	Miglierina	38.947	16.472		4	4	4
505	IT_64483	Tortora	39.941	15.804		4	4	4
506	IT_64431	Scalea	39.814	15.792		4	4	4
507	IT_64426	San Vincenzo la Costa	39.364	16.151		4	4	4
508	IT_64414	Sant'Agata di Esaro	39.619	15.983		4	4	4
509	IT_64382	San Marco Argentano	39.556	16.119		4	4	4
510	IT_64338	San Donato di Ninea	39.711	16.049		4	4	4
511	IT_64325	San Benedetto Ullano	39.426	16.123		4	4	4
512	IT_64221	Praia a Mare	39.898	15.78		4	4	4
513	IT_64172	Orsomarso	39.799	15.909		4	4	4
514	IT_64165	Mormanno	39.889	15.989		4	4	4
515	IT_63966	Frascineto	39.834	16.261		4	4	4
516	IT_63684	Calopezzati	39.56	16.802		4	4	4
517	IT_63569	Amendolara	39.952	16.581		4	4	4
518	IT_63027	Francavilla in Sinni	40.08	16.204		4	4	4
519	IT_62807	Sternatia	40.22	18.227		4	4	4
520	IT_62588	Oria	40.498	17.642		4	4	4
521	IT_62584	Latiano	40.552	17.719		4	4	4
522	IT_62564	Fasano	40.835	17.36		4	4	4
523	IT_62526	Taranto	40.471	17.243		4	4	4
524	IT_62485	Mottola	40.634	17.037		4	4	4
525	IT_62471	Maruggio	40.321	17.571		4	4	4
526	IT_62442	Crispiano	40.604	17.232		4	4	4
527	IT_62426	Turi	40.916	17.021		4	4	4
528	IT_62417	Sannicandro di Bari	41	16.798		4	4	4
529	IT_62416	Sammichele di Bari	40.887	16.948		4	4	4
530	IT_62415	Ruvo di Puglia	41.116	16.486		4	4	4
531	IT_62406	Palo del Colle	41.057	16.702		4	4	4
532	IT_62360	Molfetta	41.2	16.597		4	4	4
533	IT_62315	Cassano delle Murge	40.889	16.771		4	4	4
534	IT_62288	Andria	41.226	16.297		4	4	4
535	IT_62265	Adelfia	41.003	16.872		4	4	4
536	IT_62241	Sannicandro Garganico	41.835	15.567		4	4	4
537	IT_62233	San Ferdinando di Puglia	41.301	16.067		4	4	4
538	IT_62232	Roseto Valfortore	41.372	15.096		4	4	4
539	IT_62231	Rodi Garganico	41.929	15.885		4	4	4
540	IT_62204	Mattinata	41.709	16.051		4	4	4
541	IT_62202	Zapponeta	41.456	15.957		4	4	4
542	IT_62161	Tremiti (San Nicola)	42.12	15.503		4	4	4
543	IT_62159	Ischitella	41.904	15.898		4	4	4
544	IT_61961	Scala	40.651	14.604		4	4	4
545	IT_61872	San Giovanni a Piro	40.05	15.45		4	4	4
546	IT_61726	Pollica	40.19	15.057		4	4	4
547	IT_61389	Castelcivita	40.495	15.232		4	4	4
548	IT_61333	Casalbuono	40.215	15.681		4	4	4
549	IT_61200	Amalfi	40.634	14.603		4	4	4
550	IT_61078	Serino (Sala)	40.853	14.873		4	4	4
551	IT_61009	Sant'Angelo a Scala	40.974	14.74		4	4	4
552	IT_61008	Sant'Angelo all'Esca	41.006	14.994		4	4	4
553	IT_60995	San Martino Valle Caudina	41.023	14.663		4	4	4
554	IT_60945	Quindici	40.862	14.648		4	4	4
555	IT_60853	Montella	40.842	15.018		4	4	4
556	IT_60847	Montefredane	40.959	14.814		4	4	4
557	IT_60825	Montefalcione	40.961	14.883		4	4	4
558	IT_60660	Candida	40.942	14.875		4	4	4
559	IT_60623	Avella	40.961	14.602		4	4	4
560	IT_60513	Tufino	40.953	14.567		4	4	4
561	IT_60504	Torre Annunziata	40.751	14.462		4	4	4
562	IT_60502	Terzigno	40.809	14.498		4	4	4
563	IT_60497	Striano	40.814	14.575		4	4	4
564	IT_60411	Sant'Antimo	40.942	14.237		4	4	4
565	IT_60175	Melito di Napoli	40.922	14.231		4	4	4
566	IT_60046	Cercola	40.856	14.355		4	4	4
567	IT_60012	Casamarciano	40.933	14.554		4	4	4
568	IT_59914	Telese	41.216	14.527		4	4	4
569	IT_59913	Solopaca	41.192	14.548		4	4	4
570	IT_59822	San Marco dei Cavoti	41.309	14.878		4	4	4
571	IT_59638	Molinara	41.295	14.909		4	4	4
572	IT_59594	Faicchio	41.277	14.479		4	4	4
573	IT_59455	Bonea	41.075	14.618		4	4	4
574	IT_59438	Benevento	41.131	14.778		4	4	4
575	IT_59425	Arpaia	41.035	14.547		4	4	4
576	IT_59343	Teano	41.251	14.068		4	4	4
577	IT_59257	Santa Maria Capua Vetere	41.078	14.256		4	4	4
578	IT_59248	San Prisco	41.086	14.279		4	4	4
579	IT_59242	San Nicola la Strada	41.051	14.332		4	4	4
580	IT_59153	Pietravairano	41.327	14.166		4	4	4
581	IT_59143	Pietramelara	41.271	14.187		4	4	4
582	IT_59133	Pastorano	41.179	14.195		4	4	4
583	IT_59132	Parete	40.959	14.165		4	4	4
584	IT_59093	Macerata Campania	41.063	14.274		4	4	4
585	IT_59084	Letino	41.452	14.253		4	4	4
586	IT_59038	Galluccio	41.352	13.955		4	4	4
587	IT_59010	Conca della Campania	41.334	13.99		4	4	4
588	IT_58962	Castel di Sasso (Cisterna)	41.192	14.278		4	4	4
589	IT_58947	Casapulla	41.076	14.29		4	4	4
590	IT_58930	Carinaro	40.982	14.216		4	4	4
591	IT_58919	Cancello ed Arnone (Cancello)	41.073	14.025		4	4	4
592	IT_58801	San Giuliano del Sannio	41.457	14.641		4	4	4
593	IT_58744	Guglionesi	41.912	14.914		4	4	4
594	IT_58730	Guardialfiera	41.803	14.793		4	4	4
595	IT_58709	Colletorto	41.664	14.97		4	4	4
596	IT_58702	Civitacampomarano	41.781	14.691		4	4	4
597	IT_58581	Bojano	41.483	14.47		4	4	4
598	IT_58533	Sessano del Molise	41.639	14.332		4	4	4
599	IT_58385	Isernia	41.591	14.228		4	4	4
600	IT_58106	San Giovanni Teatino	42.41	14.201		4	4	4
601	IT_57967	Palena	41.984	14.138		4	4	4
602	IT_57698	Cupello	42.072	14.673		4	4	4
603	IT_57597	Casalincontrada	42.29	14.135		4	4	4
604	IT_56356	Scontrone	41.746	14.039		4	4	4
605	IT_56330	San Pio delle Camere	42.286	13.656		4	4	4
618	IT_59167	Prata Sannita (Superiore)	41.432	14.203		4	3-4	3-4
720	IT_62757	Nardò	40.178	18.031		4	3	3
721	IT_57660	Chieti	42.352	14.168		4	3	3
606	IT_61663	Ottati	40.462	15.316		3-4	4	4
619	IT_72532	Pescosansonesco Nuovo	42.253	13.884		3-4	3-4	3-4
620	IT_64978	Polia	38.751	16.312		3-4	3-4	3-4
621	IT_64844	Lamezia Terme (Nicastro)	38.974	16.318		3-4	3-4	3-4
622	IT_64799	Girifalco	38.822	16.425		3-4	3-4	3-4
623	IT_64550	Caccuri	39.227	16.779		3-4	3-4	3-4
624	IT_64504	Villapiana	39.845	16.456		3-4	3-4	3-4
625	IT_64458	Spezzano della Sila	39.299	16.34		3-4	3-4	3-4
626	IT_64448	Spezzano Albanese	39.67	16.311		3-4	3-4	3-4
627	IT_64413	Santa Domenica Talao	39.819	15.855		3-4	3-4	3-4
628	IT_64269	Rocca Imperiale	40.109	16.579		3-4	3-4	3-4
629	IT_64213	Pietrapaola	39.486	16.815		3-4	3-4	3-4
630	IT_64138	Mongrassano	39.526	16.111		3-4	3-4	3-4
631	IT_64107	Marano Principato	39.299	16.175		3-4	3-4	3-4
632	IT_64088	Maierà	39.716	15.851		3-4	3-4	3-4
633	IT_63948	Firmo	39.721	16.176		3-4	3-4	3-4
634	IT_63926	Diamante	39.678	15.82		3-4	3-4	3-4
635	IT_63918	Crosia	39.566	16.773		3-4	3-4	3-4
636	IT_63773	Cervicati	39.542	16.128		3-4	3-4	3-4
637	IT_63660	Bisignano	39.513	16.285		3-4	3-4	3-4
638	IT_63577	Aprigliano	39.24	16.342		3-4	3-4	3-4
639	IT_62781	Salice Salentino	40.384	17.964		3-4	3-4	3-4
640	IT_62699	Galatone	40.147	18.07		3-4	3-4	3-4
641	IT_62673	Castrignano de' Greci	40.173	18.296		3-4	3-4	3-4
642	IT_62657	Aradeo	40.13	18.129		3-4	3-4	3-4
643	IT_62561	Erchie	40.435	17.735		3-4	3-4	3-4
644	IT_62548	Cellino San Marco	40.471	17.965		3-4	3-4	3-4
645	IT_62536	Brindisi	40.637	17.945		3-4	3-4	3-4
646	IT_62460	Lizzano	40.391	17.448		3-4	3-4	3-4
647	IT_62453	Grottaglie	40.535	17.433		3-4	3-4	3-4
648	IT_62441	Castellaneta	40.629	16.935		3-4	3-4	3-4
649	IT_62427	Valenzano	41.043	16.884		3-4	3-4	3-4
650	IT_62425	Triggiano	41.063	16.923		3-4	3-4	3-4
651	IT_62409	Polignano a Mare	40.994	17.219		3-4	3-4	3-4
652	IT_62353	Locorotondo	40.755	17.325		3-4	3-4	3-4
653	IT_62320	Castellana Grotte	40.884	17.167		3-4	3-4	3-4
654	IT_62257	Vico del Gargano	41.895	15.958		3-4	3-4	3-4
655	IT_62246	Serracapriola	41.806	15.16		3-4	3-4	3-4
656	IT_62225	Peschici	41.947	16.014		3-4	3-4	3-4
657	IT_62119	Celenza Valfortore	41.561	14.98		3-4	3-4	3-4
658	IT_62077	Alberona	41.432	15.123		3-4	3-4	3-4
659	IT_62066	Vibonati	40.099	15.584		3-4	3-4	3-4
660	IT_61551	Maiori	40.65	14.643		3-4	3-4	3-4
661	IT_61093	Sperone	40.952	14.603		3-4	3-4	3-4
662	IT_60677	Castelvetere sul Calore	40.929	14.987		3-4	3-4	3-4
663	IT_60483	Somma Vesuviana	40.872	14.437		3-4	3-4	3-4
664	IT_60431	Saviano	40.909	14.511		3-4	3-4	3-4
665	IT_60091	Ischia	40.743	13.942		3-4	3-4	3-4
666	IT_60006	Cardito	40.945	14.295		3-4	3-4	3-4
667	IT_59998	Capri	40.55	14.243		3-4	3-4	3-4
668	IT_59706	Pietraroja	41.347	14.549		3-4	3-4	3-4
669	IT_59665	Morcone	41.34	14.664		3-4	3-4	3-4
670	IT_59617	Frasso Telesino	41.156	14.527		3-4	3-4	3-4
671	IT_59539	Cerreto Sannita	41.285	14.56		3-4	3-4	3-4
672	IT_59364	Trentola-Ducenta	40.976	14.181		3-4	3-4	3-4
673	IT_59280	Cellole	41.203	13.854		3-4	3-4	3-4
674	IT_59266	Sant'Arpino	40.957	14.253		3-4	3-4	3-4
675	IT_59261	San Tammaro	41.075	14.23		3-4	3-4	3-4
676	IT_59244	San Pietro Infine	41.445	13.96		3-4	3-4	3-4
677	IT_59157	Pignataro Maggiore	41.19	14.172		3-4	3-4	3-4
678	IT_59120	Marzano Appio (Grottola)	41.316	14.04		3-4	3-4	3-4
679	IT_58982	Castel Volturno	41.033	13.943		3-4	3-4	3-4
680	IT_58916	Calvi Risorta (Visciano-Zuni)	41.214	14.126		3-4	3-4	3-4
681	IT_58858	Vinchiaturo	41.493	14.587		3-4	3-4	3-4
682	IT_58818	Sant'Elia a Pianisi	41.62	14.875		3-4	3-4	3-4
683	IT_58816	Santa Croce di Magliano	41.712	14.992		3-4	3-4	3-4
684	IT_58812	San Massimo	41.492	14.41		3-4	3-4	3-4
685	IT_58804	San Martino in Pensilis	41.871	15.013		3-4	3-4	3-4
686	IT_58791	Salcito	41.747	14.511		3-4	3-4	3-4
687	IT_58779	Pietracupa	41.682	14.52		3-4	3-4	3-4
688	IT_58762	Molise	41.632	14.492		3-4	3-4	3-4
689	IT_58749	Larino	41.8	14.911		3-4	3-4	3-4
690	IT_58741	Guardiaregia	41.436	14.541		3-4	3-4	3-4
691	IT_58723	Duronia	41.659	14.459		3-4	3-4	3-4
692	IT_58633	Casalciprano	41.579	14.528		3-4	3-4	3-4
693	IT_58615	Campodipietra	41.557	14.748		3-4	3-4	3-4
694	IT_58607	Campobasso	41.561	14.66		3-4	3-4	3-4
695	IT_58600	Busso	41.556	14.559		3-4	3-4	3-4
696	IT_58597	Bonefro	41.704	14.935		3-4	3-4	3-4
697	IT_58568	Baranello	41.528	14.554		3-4	3-4	3-4
698	IT_58564	Acquaviva Collecroce	41.867	14.746		3-4	3-4	3-4
699	IT_58501	San Pietro Avellana	41.79	14.182		3-4	3-4	3-4
700	IT_58446	Pesche	41.61	14.282		3-4	3-4	3-4
701	IT_58308	Castelpizzuto	41.521	14.292		3-4	3-4	3-4
702	IT_58279	Cantalupo nel Sannio	41.521	14.393		3-4	3-4	3-4
703	IT_58226	Vacri	42.297	14.232		3-4	3-4	3-4
704	IT_57707	Fara San Martino	42.09	14.205		3-4	3-4	3-4
705	IT_57645	Castiglione Messer Marino	41.866	14.451		3-4	3-4	3-4
706	IT_57624	Casoli	42.118	14.292		3-4	3-4	3-4
707	IT_57586	Casalbordino	42.15	14.585		3-4	3-4	3-4
708	IT_57334	Montesilvano (Marina)	42.512	14.146		3-4	3-4	3-4
709	IT_57313	Manoppello	42.258	14.06		3-4	3-4	3-4
710	IT_57112	Bolognano	42.217	13.96		3-4	3-4	3-4
711	IT_56863	Pineto	42.608	14.067		3-4	3-4	3-4
712	IT_56454	Atri	42.58	13.978		3-4	3-4	3-4
713	IT_56303	Pratola Peligna	42.098	13.875		3-4	3-4	3-4
714	IT_56298	Prata d'Ansidonia	42.278	13.609		3-4	3-4	3-4
715	IT_55983	Bisegna	41.921	13.757		3-4	3-4	3-4
716	IT_55799	Torrice	41.629	13.398		3-4	3-4	3-4
717	IT_55161	Collepardo	41.763	13.369		3-4	3-4	3-4
718	IT_54834	Arpino	41.647	13.61		3-4	3-4	3-4
719	IT_54464	Velletri	41.688	12.778		3-4	3-4	3-4
722	IT_64038	Laino Borgo	39.954	15.974		3-4	3	3
723	IT_62703	Gallipoli	40.055	17.988		3-4	3	3
724	IT_62243	San Severo	41.685	15.381		3-4	3	3
725	IT_65031	Santa Severina	39.147	16.913		3	3	3
726	IT_64972	Platania	39.005	16.32		3	3	3
727	IT_64959	Petilia Policastro	39.112	16.789		3	3	3
728	IT_64950	Parghelia	38.681	15.923		3	3	3
729	IT_64886	Magisano	39.013	16.628		3	3	3
730	IT_64719	Feroleto Antico	38.962	16.388		3	3	3
731	IT_64710	Drapia	38.664	15.911		3	3	3
732	IT_64476	Torano Castello	39.504	16.147		3	3	3
733	IT_64444	Serra Pedace	39.277	16.346		3	3	3
734	IT_64443	Serra d'Aiello	39.089	16.129		3	3	3
735	IT_64428	Saracena	39.775	16.157		3	3	3
736	IT_64412	Santa Caterina Albanese	39.585	16.071		3	3	3
737	IT_64265	Rende	39.331	16.183		3	3	3
738	IT_64195	Paterno Calabro	39.228	16.265		3	3	3
739	IT_64115	Marzi	39.171	16.306		3	3	3
740	IT_64074	Lungro	39.742	16.122		3	3	3
741	IT_63987	Fuscaldo	39.415	16.03		3	3	3
742	IT_63852	Corigliano Calabro	39.596	16.519		3	3	3
743	IT_63781	Cetraro	39.516	15.941		3	3	3
744	IT_63760	Cerchiara di Calabria	39.859	16.383		3	3	3
745	IT_63559	Amantea	39.132	16.081		3	3	3
746	IT_63546	Aiello Calabro	39.117	16.166		3	3	3
747	IT_63514	Acri	39.491	16.386		3	3	3
748	IT_62802	Sogliano Cavour	40.146	18.196		3	3	3
749	IT_62793	San Pietro in Lama	40.307	18.129		3	3	3
750	IT_62766	Novoli	40.377	18.049		3	3	3
751	IT_62733	Matino	40.031	18.134		3	3	3
752	IT_62729	Maglie	40.119	18.299		3	3	3
753	IT_62683	Collepasso	40.072	18.162		3	3	3
754	IT_62663	Calimera	40.25	18.28		3	3	3
755	IT_62638	San Donaci	40.446	17.922		3	3	3
756	IT_62603	Ostuni	40.729	17.577		3	3	3
757	IT_62543	Carovigno	40.705	17.658		3	3	3
758	IT_62500	Sava	40.403	17.557		3	3	3
759	IT_62475	Monteiasi	40.502	17.381		3	3	3
760	IT_62467	Martina Franca	40.705	17.336		3	3	3
761	IT_62447	Fragagnano	40.43	17.474		3	3	3
762	IT_62430	Avetrana	40.349	17.726		3	3	3
763	IT_62305	Bitetto	41.04	16.748		3	3	3
764	IT_62259	Volturara Appula	41.495	15.052		3	3	3
765	IT_61745	Positano	40.628	14.485		3	3	3
766	IT_61173	Villamaina	40.969	15.09		3	3	3
767	IT_60721	Gesualdo	41.006	15.07		3	3	3
768	IT_60378	San Giuseppe Vesuviano	40.832	14.504		3	3	3
769	IT_60324	Pozzuoli	40.822	14.123		3	3	3
770	IT_60065	Forio	40.735	13.859		3	3	3
771	IT_60014	Casamicciola Terme	40.743	13.908		3	3	3
772	IT_59956	Bacoli	40.797	14.08		3	3	3
773	IT_59641	Montefalcone di Val Fortore	41.325	15.01		3	3	3
774	IT_59629	Limatola	41.14	14.393		3	3	3
775	IT_59382	Villa Literno	41.009	14.074		3	3	3
776	IT_59225	Ruviano	41.209	14.41		3	3	3
777	IT_59208	Roccamonfina	41.288	13.983		3	3	3
778	IT_59199	Rocca d'Evandro	41.388	13.908		3	3	3
779	IT_59129	Mondragone	41.115	13.896		3	3	3
780	IT_59031	Frignano	40.995	14.178		3	3	3
781	IT_59022	Formicola	41.211	14.232		3	3	3
782	IT_59020	Falciano del Massico	41.165	13.948		3	3	3
783	IT_58853	Torella del Sannio	41.64	14.52		3	3	3
784	IT_58849	Termoli	42	14.993		3	3	3
785	IT_58803	San Giuliano di Puglia	41.685	14.964		3	3	3
786	IT_58795	San Giacomo degli Schiavoni	41.964	14.946		3	3	3
787	IT_58794	San Felice del Molise	41.891	14.702		3	3	3
788	IT_58790	Rotello	41.748	15.005		3	3	3
789	IT_58782	Riccia	41.485	14.836		3	3	3
790	IT_58777	Petrella Tifernina	41.691	14.697		3	3	3
791	IT_58776	Petacciato	42.011	14.86		3	3	3
792	IT_58769	Montenero di Bisaccia	41.957	14.782		3	3	3
793	IT_58764	Montagano	41.646	14.673		3	3	3
794	IT_58728	Gildone	41.51	14.74		3	3	3
795	IT_58697	Cercepiccola	41.459	14.666		3	3	3
796	IT_58635	Castellino del Biferno	41.702	14.731		3	3	3
797	IT_58634	Castelbottaccio	41.753	14.707		3	3	3
798	IT_58627	Casacalenda	41.741	14.849		3	3	3
799	IT_58623	Campomarino	41.957	15.035		3	3	3
800	IT_58614	Campochiaro	41.449	14.505		3	3	3
801	IT_58510	Santa Maria del Molise	41.553	14.368		3	3	3
802	IT_58477	Pozzilli	41.512	14.061		3	3	3
803	IT_58462	Pietrabbondante	41.748	14.386		3	3	3
804	IT_58445	Monteroduni	41.522	14.176		3	3	3
805	IT_58426	Miranda	41.642	14.248		3	3	3
806	IT_58347	Forlì del Sannio	41.695	14.179		3	3	3
807	IT_58310	Castel San Vincenzo	41.655	14.063		3	3	3
808	IT_58125	Sant'Eusanio del Sangro	42.168	14.331		3	3	3
809	IT_58032	Ripa Teatina	42.358	14.234		3	3	3
810	IT_57965	Paglieta	42.165	14.498		3	3	3
811	IT_57873	Lettopalena	42.002	14.159		3	3	3
812	IT_57851	Lanciano	42.229	14.39		3	3	3
813	IT_57845	Lama dei Peligni	42.042	14.187		3	3	3
814	IT_57830	Guardiagrele	42.191	14.221		3	3	3
815	IT_57733	Fossacesia	42.244	14.48		3	3	3
816	IT_57715	Filetto	42.226	14.244		3	3	3
817	IT_57640	Castel Frentano	42.197	14.355		3	3	3
818	IT_57569	Casacanditella	42.249	14.2		3	3	3
819	IT_57560	Canosa Sannita	42.295	14.303		3	3	3
820	IT_57425	Scafa	42.268	14.003		3	3	3
821	IT_57395	Popoli	42.171	13.833		3	3	3
822	IT_57293	Lettomanoppello	42.236	14.037		3	3	3
823	IT_57158	Castiglione a Casauria	42.236	13.897		3	3	3
824	IT_57148	Carpineto della Nora	42.333	13.861		3	3	3
825	IT_57131	Caramanico Terme	42.158	14.001		3	3	3
826	IT_56916	Silvi	42.546	14.123		3	3	3
827	IT_56897	Roseto degli Abruzzi	42.675	14.016		3	3	3
828	IT_56595	Castilenti	42.533	13.918		3	3	3
829	IT_56306	Prezza	42.057	13.834		3	3	3
830	IT_56261	Opi	41.78	13.83		3	3	3
831	IT_56142	L'Aquila	42.351	13.399		3	3	3
832	IT_56113	Introdacqua	42.008	13.898		3	3	3
833	IT_56097	Fossa	42.292	13.488		3	3	3
834	IT_55896	Vicalvi	41.681	13.714		3	3	3
835	IT_55710	Sora	41.718	13.613		3	3	3
836	IT_55595	San Giovanni Incarico	41.503	13.558		3	3	3
837	IT_55571	San Giorgio a Liri	41.407	13.765		3	3	3
838	IT_55505	Pontecorvo	41.456	13.667		3	3	3
839	IT_55325	Isola del Liri	41.68	13.579		3	3	3
840	IT_55133	Cervaro	41.481	13.904		3	3	3
841	IT_55082	Castelliri	41.678	13.551		3	3	3
842	IT_55019	Cassino	41.488	13.831		3	3	3
843	IT_54873	Atina	41.619	13.8		3	3	3
844	IT_53984	Pomezia	41.669	12.501		3	3	3
845	IT_53973	Palombara Sabina	42.066	12.766		3	3	3
846	IT_53891	Montelanico	41.65	13.04		3	3	3
847	IT_53851	Lariano	41.725	12.833		3	3	3
848	IT_53661	Arsoli	42.04	13.019		3	3	3
849	IT_53233	Concerviano	42.322	12.986		3	3	3
850	IT_53053	Amatrice	42.628	13.29		3	3	3
855	IT_54720	Sperlonga	41.258	13.432		3	2-3	2-3
856	IT_52511	Grottammare	42.986	13.87		3	2-3	2-3
884	IT_53652	Ariccia	41.72	12.671		3	2	2
210	IT_61712	Petina	40.533	15.375		2-3	5	5
857	IT_64894	Marcellinara	38.928	16.494		2-3	2-3	2-3
858	IT_64468	Spezzano Piccolo	39.289	16.343		2-3	2-3	2-3
859	IT_64408	San Pietro in Guarano	39.342	16.311		2-3	2-3	2-3
860	IT_64320	Rovito	39.308	16.321		2-3	2-3	2-3
861	IT_63943	Falconara Albanese	39.275	16.091		2-3	2-3	2-3
862	IT_62748	Monteroni di Lecce	40.326	18.096		2-3	2-3	2-3
863	IT_62672	Castri di Lecce	40.273	18.264		2-3	2-3	2-3
864	IT_62642	San Pietro Vernotico	40.488	17.997		2-3	2-3	2-3
865	IT_62640	San Michele Salentino	40.63	17.633		2-3	2-3	2-3
866	IT_62586	Mesagne	40.558	17.808		2-3	2-3	2-3
867	IT_62464	Manduria	40.399	17.634		2-3	2-3	2-3
868	IT_62109	Carpino	41.843	15.857		2-3	2-3	2-3
869	IT_58785	Ripalimosani	41.613	14.666		2-3	2-3	2-3
870	IT_58756	Mafalda	41.942	14.716		2-3	2-3	2-3
871	IT_58755	Macchia Valfortore	41.593	14.911		2-3	2-3	2-3
872	IT_58753	Lucito	41.731	14.688		2-3	2-3	2-3
873	IT_58616	Campolieto	41.635	14.767		2-3	2-3	2-3
874	IT_58527	Scapoli	41.616	14.058		2-3	2-3	2-3
875	IT_58513	Sant'Angelo del Pesco	41.883	14.256		2-3	2-3	2-3
876	IT_57684	Crecchio	42.298	14.326		2-3	2-3	2-3
877	IT_57677	Colledimacine	42.004	14.201		2-3	2-3	2-3
878	IT_56856	Penna Sant'Andrea	42.593	13.772		2-3	2-3	2-3
879	IT_56321	Roccaraso	41.846	14.082		2-3	2-3	2-3
880	IT_56307	Raiano	42.102	13.813		2-3	2-3	2-3
881	IT_55931	Ateleta	41.855	14.199		2-3	2-3	2-3
882	IT_55889	Veroli	41.692	13.419		2-3	2-3	2-3
607	IT_59705	Pesco Sannita	41.234	14.812		2	4	4
885	IT_63662	Bocchigliero	39.418	16.751		2	2	2
886	IT_62258	Vieste	41.882	16.18		2	2	2
887	IT_58774	Palata	41.89	14.785		2	2	2
888	IT_58725	Fossalto	41.674	14.546		2	2	2
889	IT_58330	Colli a Volturno	41.598	14.103		2	2	2
890	IT_58301	Castelpetroso	41.559	14.345		2	2	2
891	IT_57913	Monteodorisio	42.086	14.652		2	2	2
892	IT_56047	Castel di Sangro	41.783	14.108		2	2	2
893	IT_53781	Frascati	41.808	12.681		2	2	2
211	IT_61171	Venticano (Campanarello)	41.046	14.912		NF	5	5
608	IT_61888	San Mauro Cilento	40.226	15.045		NF	4	4
851	IT_62262	Volturino	41.478	15.125		NF	3	3
852	IT_56390	Sulmona	42.047	13.928		NF	3	3
883	IT_55928	Alfedena	41.735	14.03		NF	2-3	2-3
894	IT_65135	Tropea	38.675	15.899		NF	2	2
895	IT_64660	Crotone	39.081	17.128		NF	2	2
896	IT_56978	Teramo	42.659	13.703		NF	2	2
897	IT_55982	Barrea	41.756	13.992		NF	2	2
919	IT_61804	Romagnano al Monte	40.627	15.457		NF	NC	NC
920	IT_59927	Torrecuso	41.189	14.68		NF	NC	NC
922	IT_65157	Zagarise	38.999	16.663		NF	NF	NF
923	IT_65137	Vallefiorita	38.775	16.461		NF	NF	NF
924	IT_65131	Tiriolo	38.947	16.509		NF	NF	NF
925	IT_65117	Taverna	39.02	16.582		NF	NF	NF
926	IT_65116	Strongoli	39.265	17.05		NF	NF	NF
927	IT_65105	Squillace	38.781	16.519		NF	NF	NF
928	IT_65096	Soveria Mannelli	39.083	16.371		NF	NF	NF
929	IT_65082	Simeri Crichi (Crichi)	38.954	16.639		NF	NF	NF
930	IT_65080	Settingiano	38.913	16.514		NF	NF	NF
931	IT_65079	Sersale	39.011	16.728		NF	NF	NF
932	IT_65044	Sellia	38.981	16.629		NF	NF	NF
933	IT_65042	Scandale	39.121	16.96		NF	NF	NF
934	IT_65037	Savelli	39.312	16.777		NF	NF	NF
935	IT_65015	San Nicola dell'Alto	39.29	16.973		NF	NF	NF
936	IT_65013	San Mauro Marchesato	39.103	16.925		NF	NF	NF
937	IT_65008	San Floro	38.837	16.519		NF	NF	NF
938	IT_64999	Rocca di Neto	39.191	17.002		NF	NF	NF
939	IT_64965	Pianopoli	38.954	16.389		NF	NF	NF
940	IT_64963	Petronà	39.043	16.758		NF	NF	NF
941	IT_64951	Pentone	38.986	16.583		NF	NF	NF
942	IT_64922	Motta Santa Lucia	39.091	16.29		NF	NF	NF
943	IT_64904	Mesoraca	39.077	16.789		NF	NF	NF
944	IT_64901	Melissa	39.303	17.022		NF	NF	NF
945	IT_64898	Martirano Lombardo	39.074	16.232		NF	NF	NF
946	IT_64897	Martirano	39.08	16.248		NF	NF	NF
947	IT_64893	Marcedusa	39.027	16.836		NF	NF	NF
948	IT_64798	Gimigliano	38.973	16.527		NF	NF	NF
949	IT_64776	Francavilla Angitola	38.777	16.271		NF	NF	NF
950	IT_64769	Fossato Serralta	38.995	16.58		NF	NF	NF
951	IT_64748	Filadelfia	38.783	16.292		NF	NF	NF
952	IT_64717	Falerna	39.002	16.173		NF	NF	NF
953	IT_64677	Curinga	38.826	16.313		NF	NF	NF
954	IT_64653	Cropani	38.967	16.782		NF	NF	NF
955	IT_64645	Cotronei	39.159	16.778		NF	NF	NF
956	IT_64643	Cortale	38.838	16.412		NF	NF	NF
957	IT_64634	Conflenti (Conflenti Inferiore)	39.071	16.286		NF	NF	NF
958	IT_64633	Cirò Marina	39.369	17.128		NF	NF	NF
959	IT_64628	Cicala	39.021	16.486		NF	NF	NF
960	IT_64595	Cerva	39.022	16.745		NF	NF	NF
961	IT_64594	Cerenzia	39.244	16.783		NF	NF	NF
962	IT_64567	Catanzaro	38.905	16.594		NF	NF	NF
963	IT_64563	Castelsilano	39.269	16.767		NF	NF	NF
964	IT_64559	Carlopoli	39.055	16.456		NF	NF	NF
965	IT_64558	Carfizzi	39.306	16.976		NF	NF	NF
966	IT_64536	Botricello	38.936	16.86		NF	NF	NF
967	IT_64534	Borgia	38.825	16.51		NF	NF	NF
968	IT_64530	Belcastro	39.017	16.785		NF	NF	NF
969	IT_64492	Trenta	39.283	16.321		NF	NF	NF
970	IT_64472	Terravecchia	39.465	16.946		NF	NF	NF
971	IT_64471	Terranova da Sibari	39.657	16.34		NF	NF	NF
972	IT_64430	Scala Coeli	39.445	16.89		NF	NF	NF
973	IT_64420	Santo Stefano di Rogliano	39.193	16.324		NF	NF	NF
974	IT_64417	Santa Sofia d'Epiro	39.546	16.329		NF	NF	NF
975	IT_64399	San Pietro in Amantea	39.136	16.112		NF	NF	NF
976	IT_64351	San Giovanni in Fiore	39.254	16.699		NF	NF	NF
977	IT_64346	San Giorgio Albanese	39.582	16.454		NF	NF	NF
978	IT_64342	Sangineto	39.604	15.913		NF	NF	NF
979	IT_64316	Rota Greca	39.467	16.113		NF	NF	NF
980	IT_64303	Rossano	39.574	16.635		NF	NF	NF
981	IT_64284	Roseto Capo Spulico	39.986	16.602		NF	NF	NF
982	IT_64280	Rose	39.399	16.288		NF	NF	NF
983	IT_64273	Rogliano	39.178	16.323		NF	NF	NF
984	IT_64206	Pedivigliano	39.11	16.305		NF	NF	NF
985	IT_64203	Pedace	39.274	16.34		NF	NF	NF
986	IT_64185	Parenti	39.162	16.41		NF	NF	NF
987	IT_64178	Paola	39.36	16.041		NF	NF	NF
988	IT_64119	Mendicino	39.26	16.193		NF	NF	NF
989	IT_64103	Marano Marchesato	39.313	16.172		NF	NF	NF
990	IT_64100	Mangone	39.203	16.334		NF	NF	NF
991	IT_64090	Malito	39.154	16.248		NF	NF	NF
992	IT_64069	Longobucco	39.449	16.611		NF	NF	NF
993	IT_64029	Lago	39.169	16.147		NF	NF	NF
994	IT_64014	Grimaldi	39.142	16.235		NF	NF	NF
995	IT_63947	Figline Vegliaturo	39.225	16.331		NF	NF	NF
996	IT_63941	Fagnano Castello	39.564	16.054		NF	NF	NF
997	IT_63931	Dipignano	39.237	16.252		NF	NF	NF
998	IT_63917	Cropalati	39.516	16.726		NF	NF	NF
999	IT_63759	Francavilla Marittima	39.82	16.388		NF	NF	NF
1000	IT_63755	Cellara	39.218	16.334		NF	NF	NF
1001	IT_63753	Celico	39.309	16.34		NF	NF	NF
1002	IT_63701	Carpanzano	39.147	16.303		NF	NF	NF
1003	IT_63690	Cariati	39.497	16.949		NF	NF	NF
1004	IT_63688	Campana	39.411	16.824		NF	NF	NF
1005	IT_63685	Caloveto	39.505	16.76		NF	NF	NF
1006	IT_63664	Bonifati	39.586	15.902		NF	NF	NF
1007	IT_63611	Belsito	39.174	16.287		NF	NF	NF
1008	IT_63595	Belmonte Calabro	39.16	16.079		NF	NF	NF
1009	IT_62839	Zollino	40.205	18.249		NF	NF	NF
1010	IT_62837	Vernole	40.287	18.303		NF	NF	NF
1011	IT_62827	Ugento	39.929	18.16		NF	NF	NF
1012	IT_62816	Trepuzzi	40.405	18.074		NF	NF	NF
1013	IT_62815	Squinzano	40.429	18.044		NF	NF	NF
1014	IT_62813	Taviano	39.981	18.086		NF	NF	NF
1015	IT_62811	Taurisano	39.956	18.215		NF	NF	NF
1016	IT_62810	Surbo	40.394	18.134		NF	NF	NF
1017	IT_62803	Soleto	40.187	18.207		NF	NF	NF
1018	IT_62791	Sannicola	40.094	18.064		NF	NF	NF
1019	IT_62788	San Donato di Lecce	40.266	18.183		NF	NF	NF
1020	IT_62786	San Cesario di Lecce	40.302	18.16		NF	NF	NF
1021	IT_62785	Sanarica	40.088	18.348		NF	NF	NF
1022	IT_62780	Ruffano	39.984	18.248		NF	NF	NF
1023	IT_62772	Parabita	40.05	18.127		NF	NF	NF
1024	IT_62764	San Cassiano	40.055	18.334		NF	NF	NF
1025	IT_62762	Neviano	40.107	18.116		NF	NF	NF
1026	IT_62758	Porto Cesareo	40.261	17.894		NF	NF	NF
1027	IT_62753	Muro Leccese	40.101	18.339		NF	NF	NF
1028	IT_62743	Melpignano	40.156	18.29		NF	NF	NF
1029	IT_62742	Melissano	39.971	18.126		NF	NF	NF
1030	IT_62735	Melendugno	40.271	18.336		NF	NF	NF
1031	IT_62731	Martano	40.201	18.302		NF	NF	NF
1032	IT_62698	Galatina	40.175	18.168		NF	NF	NF
1033	IT_62688	Cutrofiano	40.125	18.2		NF	NF	NF
1034	IT_62687	Cursi	40.149	18.314		NF	NF	NF
1035	IT_62685	Corigliano d'Otranto	40.159	18.257		NF	NF	NF
1036	IT_62684	Copertino	40.272	18.048		NF	NF	NF
1037	IT_62671	Casarano	40.01	18.16		NF	NF	NF
1038	IT_62669	Carpignano Salentino	40.196	18.34		NF	NF	NF
1039	IT_62667	Carmiano	40.346	18.046		NF	NF	NF
1040	IT_62665	Cannole	40.166	18.365		NF	NF	NF
1041	IT_62664	Campi Salentina	40.398	18.019		NF	NF	NF
1042	IT_62662	Botrugno	40.064	18.323		NF	NF	NF
1043	IT_62661	Bagnolo del Salento	40.148	18.352		NF	NF	NF
1044	IT_62655	Andrano	39.984	18.382		NF	NF	NF
1045	IT_62651	Alezio	40.061	18.057		NF	NF	NF
1046	IT_62644	Torchiarolo	40.483	18.052		NF	NF	NF
1047	IT_62643	San Vito dei Normanni	40.656	17.708		NF	NF	NF
1048	IT_62497	San Giorgio Jonico	40.456	17.38		NF	NF	NF
1049	IT_62196	Manfredonia	41.63	15.917		NF	NF	NF
1050	IT_62118	Castelnuovo della Daunia	41.583	15.12		NF	NF	NF
1051	IT_60416	San Vitaliano	40.925	14.48		NF	NF	NF
1052	IT_60101	Lacco Ameno	40.752	13.888		NF	NF	NF
1053	IT_59949	Anacapri	40.554	14.217		NF	NF	NF
1054	IT_59911	Sassinoro	41.374	14.664		NF	NF	NF
1055	IT_59622	Guardia Sanframondi	41.255	14.597		NF	NF	NF
1056	IT_59578	Cusano Mutri	41.338	14.507		NF	NF	NF
1057	IT_59240	San Gregorio Matese	41.385	14.374		NF	NF	NF
1058	IT_59003	Ciorlano	41.45	14.159		NF	NF	NF
1059	IT_58976	Castel Morrone (Annunziata)	41.12	14.356		NF	NF	NF
1060	IT_58922	Capriati A Volturno	41.468	14.147		NF	NF	NF
1061	IT_58884	Baia e Latina (Baia)	41.3	14.251		NF	NF	NF
1062	IT_58848	Tavenna	41.908	14.764		NF	NF	NF
1063	IT_58834	Spinete	41.544	14.488		NF	NF	NF
1064	IT_58829	Sepino	41.407	14.619		NF	NF	NF
1065	IT_58793	San Biase	41.715	14.59		NF	NF	NF
1066	IT_58783	Ripabottoni	41.689	14.807		NF	NF	NF
1067	IT_58773	Oratino	41.584	14.586		NF	NF	NF
1068	IT_58771	Morrone del Sannio	41.712	14.779		NF	NF	NF
1069	IT_58768	Montemitro	41.888	14.647		NF	NF	NF
1070	IT_58766	Montefalcone nel Sannio	41.865	14.64		NF	NF	NF
1071	IT_58765	Montecilfone	41.903	14.837		NF	NF	NF
1072	IT_58763	Monacilioni	41.611	14.809		NF	NF	NF
1073	IT_58761	Mirabello Sannitico	41.515	14.674		NF	NF	NF
1074	IT_58754	Lupara	41.763	14.733		NF	NF	NF
1075	IT_58727	Gambatesa	41.509	14.913		NF	NF	NF
1076	IT_58688	Cercemaggiore	41.46	14.722		NF	NF	NF
1077	IT_58638	Castropignano	41.62	14.561		NF	NF	NF
1078	IT_58493	Roccamandolfi	41.493	14.35		NF	NF	NF
1079	IT_58492	Rionero Sannitico	41.712	14.14		NF	NF	NF
1080	IT_58464	Pizzone	41.667	14.035		NF	NF	NF
1081	IT_58444	Montenero Val Cocchiara	41.717	14.068		NF	NF	NF
1082	IT_58414	Macchiagodena	41.558	14.405		NF	NF	NF
1083	IT_58404	Macchia d'Isernia	41.562	14.167		NF	NF	NF
1084	IT_58370	Frosolone	41.601	14.449		NF	NF	NF
1085	IT_58327	Civitanova del Sannio	41.668	14.404		NF	NF	NF
1086	IT_58326	Chiauci	41.678	14.385		NF	NF	NF
1087	IT_58314	Cerro al Volturno	41.656	14.103		NF	NF	NF
1088	IT_58312	Castelverrino	41.767	14.397		NF	NF	NF
1089	IT_58295	Castel del Giudice	41.855	14.232		NF	NF	NF
1090	IT_58294	Carpinone	41.593	14.325		NF	NF	NF
1091	IT_58287	Carovilli	41.714	14.296		NF	NF	NF
1092	IT_58286	Capracotta	41.833	14.264		NF	NF	NF
1093	IT_58273	Bagnoli del Trigno	41.703	14.457		NF	NF	NF
1094	IT_58260	Agnone	41.809	14.376		NF	NF	NF
1095	IT_58252	Villa Santa Maria	41.949	14.35		NF	NF	NF
1096	IT_58250	Villamagna	42.333	14.237		NF	NF	NF
1097	IT_58215	Tufillo	41.915	14.627		NF	NF	NF
1098	IT_58211	Torricella Peligna	42.025	14.26		NF	NF	NF
1099	IT_58191	Tornareccio	42.039	14.412		NF	NF	NF
1100	IT_58181	Torino di Sangro	42.187	14.541		NF	NF	NF
1101	IT_58163	Schiavi di Abruzzo	41.816	14.485		NF	NF	NF
1102	IT_58136	San Vito Chietino	42.302	14.446		NF	NF	NF
1103	IT_58115	Santa Maria Imbaro	42.218	14.451		NF	NF	NF
1104	IT_58112	San Salvo	42.046	14.731		NF	NF	NF
1105	IT_58099	San Giovanni Lipioni	41.843	14.562		NF	NF	NF
1106	IT_58098	San Buono	41.98	14.571		NF	NF	NF
1107	IT_58094	Rosello	41.901	14.35		NF	NF	NF
1108	IT_58092	Roio del Sangro	41.912	14.372		NF	NF	NF
1109	IT_58089	Roccaspinalveti	41.938	14.471		NF	NF	NF
1110	IT_58059	Rocca San Giovanni	42.251	14.465		NF	NF	NF
1111	IT_58029	Rapino	42.211	14.188		NF	NF	NF
1112	IT_58025	Quadri	41.925	14.288		NF	NF	NF
1113	IT_58013	Poggiofiorito	42.256	14.324		NF	NF	NF
1114	IT_58011	Pizzoferrato	41.922	14.238		NF	NF	NF
1115	IT_57998	Perano	42.107	14.397		NF	NF	NF
1116	IT_57989	Pennapiedimonte	42.151	14.195		NF	NF	NF
1117	IT_57976	Palombaro	42.126	14.231		NF	NF	NF
1118	IT_57927	Orsogna	42.219	14.283		NF	NF	NF
1119	IT_57903	Montebello sul Sangro	41.987	14.325		NF	NF	NF
1120	IT_57902	Montazzoli	41.948	14.43		NF	NF	NF
1121	IT_57897	Miglianico	42.359	14.292		NF	NF	NF
1122	IT_57874	Liscia	41.954	14.557		NF	NF	NF
1123	IT_57839	Guilmi	41.997	14.476		NF	NF	NF
1124	IT_57818	Giuliano Teatino	42.293	14.276		NF	NF	NF
1125	IT_57814	Gissi	42.02	14.546		NF	NF	NF
1126	IT_57795	Gamberale	41.905	14.209		NF	NF	NF
1127	IT_57782	Furci	42.007	14.591		NF	NF	NF
1128	IT_57778	Frisa	42.262	14.368		NF	NF	NF
1129	IT_57775	Fresagrandinaria	41.976	14.664		NF	NF	NF
1130	IT_57750	Francavilla al Mare	42.413	14.302		NF	NF	NF
1131	IT_57676	Civitella Messer Raimondo	42.089	14.217		NF	NF	NF
1132	IT_57577	Casalanguida	42.037	14.498		NF	NF	NF
1133	IT_57556	Bucchianico	42.304	14.181		NF	NF	NF
1134	IT_57546	Borrello	41.919	14.305		NF	NF	NF
1135	IT_57543	Bomba	42.035	14.366		NF	NF	NF
1136	IT_57520	Ari	42.291	14.26		NF	NF	NF
1137	IT_57515	Archi	42.089	14.382		NF	NF	NF
1138	IT_57484	Villa Celiera	42.382	13.859		NF	NF	NF
1139	IT_57479	Vicoli	42.342	13.898		NF	NF	NF
1140	IT_57473	Turrivalignani	42.262	14.028		NF	NF	NF
1141	IT_57466	Torre de' Passeri	42.244	13.932		NF	NF	NF
1142	IT_57464	Tocco da Casauria	42.214	13.914		NF	NF	NF
1143	IT_57421	San Valentino in Abruzzo Citeriore	42.234	13.987		NF	NF	NF
1144	IT_57406	Rosciano	42.321	14.043		NF	NF	NF
1145	IT_57398	Roccamorice	42.214	14.024		NF	NF	NF
1146	IT_57394	Pietranico	42.276	13.911		NF	NF	NF
1147	IT_57381	Pianella	42.396	14.046		NF	NF	NF
1148	IT_57354	Penne	42.456	13.929		NF	NF	NF
1149	IT_57308	Loreto Aprutino	42.433	13.986		NF	NF	NF
1150	IT_57278	Farindola	42.441	13.823		NF	NF	NF
1151	IT_57260	Elice	42.519	13.968		NF	NF	NF
1152	IT_57221	Collecorvino	42.459	14.014		NF	NF	NF
1153	IT_57212	Civitella Casanova	42.365	13.888		NF	NF	NF
1154	IT_57210	Civitaquana	42.326	13.897		NF	NF	NF
1155	IT_57171	Cepagatti	42.364	14.071		NF	NF	NF
1156	IT_57163	Catignano	42.346	13.951		NF	NF	NF
1157	IT_57126	Cappelle sul Tavo	42.465	14.103		NF	NF	NF
1158	IT_57123	Bussi sul Tirino	42.21	13.826		NF	NF	NF
1159	IT_57101	Alanno	42.295	13.97		NF	NF	NF
1160	IT_57084	Valle Castellana	42.736	13.497		NF	NF	NF
1161	IT_57046	Tossicia	42.545	13.648		NF	NF	NF
1162	IT_57035	Tortoreto	42.804	13.914		NF	NF	NF
1163	IT_57021	Torricella Sicura	42.658	13.656		NF	NF	NF
1164	IT_56907	Sant'Egidio alla Vibrata	42.825	13.716		NF	NF	NF
1165	IT_56878	Rocca Santa Maria (Imposte)	42.686	13.528		NF	NF	NF
1166	IT_56860	Pietracamela	42.524	13.554		NF	NF	NF
1167	IT_56851	Notaresco	42.659	13.894		NF	NF	NF
1168	IT_56829	Nereto	42.819	13.817		NF	NF	NF
1169	IT_56827	Mosciano Sant'Angelo	42.748	13.888		NF	NF	NF
1170	IT_56816	Morro d'Oro	42.664	13.918		NF	NF	NF
1171	IT_56803	Montorio al Vomano	42.582	13.629		NF	NF	NF
1172	IT_56786	Montefino	42.544	13.885		NF	NF	NF
1173	IT_56767	Isola del Gran Sasso d'Italia	42.502	13.661		NF	NF	NF
1174	IT_56757	Giulianova	42.752	13.957		NF	NF	NF
1175	IT_56716	Cortino	42.622	13.509		NF	NF	NF
1176	IT_56710	Corropoli	42.827	13.835		NF	NF	NF
1177	IT_56697	Colonnella	42.872	13.866		NF	NF	NF
1178	IT_56676	Colledara	42.54	13.676		NF	NF	NF
1179	IT_56612	Cellino Attanasio	42.586	13.859		NF	NF	NF
1180	IT_56589	Castiglione Messer Raimondo	42.531	13.882		NF	NF	NF
1181	IT_56576	Castelli	42.489	13.712		NF	NF	NF
1182	IT_56558	Castellalto	42.677	13.818		NF	NF	NF
1183	IT_56538	Canzano	42.646	13.804		NF	NF	NF
1184	IT_56474	Bellante	42.744	13.806		NF	NF	NF
1185	IT_56467	Basciano	42.594	13.74		NF	NF	NF
1186	IT_56445	Arsita	42.502	13.784		NF	NF	NF
1187	IT_56442	Vittorito	42.125	13.817		NF	NF	NF
1188	IT_56440	Villavallelonga	41.869	13.623		NF	NF	NF
1189	IT_56435	Villalago	41.935	13.838		NF	NF	NF
1190	IT_56434	Trasacco	41.958	13.537		NF	NF	NF
1191	IT_56431	Tornimparte (Villagrande)	42.29	13.301		NF	NF	NF
1192	IT_56416	Tione degli Abruzzi	42.204	13.636		NF	NF	NF
1193	IT_56406	Tagliacozzo	42.068	13.251		NF	NF	NF
1194	IT_56379	Secinaro	42.154	13.679		NF	NF	NF
1195	IT_56377	Scurcola Marsicana	42.065	13.342		NF	NF	NF
1196	IT_56355	Scanno	41.903	13.881		NF	NF	NF
1197	IT_56352	San Vincenzo Valle Roveto	41.833	13.524		NF	NF	NF
1198	IT_56326	San Demetrio Ne' Vestini	42.289	13.558		NF	NF	NF
1199	IT_56324	San Benedetto in Perillis	42.184	13.771		NF	NF	NF
1200	IT_56323	San Benedetto dei Marsi	42.004	13.622		NF	NF	NF
1201	IT_56316	Rocca di Mezzo	42.206	13.521		NF	NF	NF
1202	IT_56310	Rocca di Botte	42.026	13.069		NF	NF	NF
1203	IT_56309	Roccacasale	42.124	13.887		NF	NF	NF
1204	IT_56308	Rivisondoli	41.87	14.067		NF	NF	NF
1205	IT_56296	Pizzoli	42.434	13.306		NF	NF	NF
1206	IT_56293	Pettorano sul Gizio	41.974	13.96		NF	NF	NF
1207	IT_56284	Pescocostanzo	41.889	14.065		NF	NF	NF
1208	IT_56281	Pescina	42.025	13.657		NF	NF	NF
1209	IT_56277	Pereto	42.059	13.101		NF	NF	NF
1210	IT_56273	Ovindoli	42.136	13.515		NF	NF	NF
1211	IT_56272	Ortucchio	41.954	13.644		NF	NF	NF
1212	IT_56263	Oricola	42.049	13.04		NF	NF	NF
1213	IT_56249	Navelli	42.238	13.729		NF	NF	NF
1214	IT_56239	Morino	41.864	13.458		NF	NF	NF
1215	IT_56229	Montereale	42.522	13.246		NF	NF	NF
1216	IT_56209	Magliano de' Marsi	42.092	13.363		NF	NF	NF
1217	IT_56204	Lucoli (Collimento)	42.291	13.339		NF	NF	NF
1218	IT_56196	Luco dei Marsi	41.959	13.471		NF	NF	NF
1219	IT_56106	Goriano Sicoli	42.08	13.775		NF	NF	NF
1220	IT_56104	Gioia dei Marsi	41.954	13.692		NF	NF	NF
1221	IT_56082	Collelongo	41.885	13.584		NF	NF	NF
1222	IT_56081	Collarmele	42.06	13.628		NF	NF	NF
1223	IT_56080	Cocullo	42.032	13.775		NF	NF	NF
1224	IT_56071	Civitella Roveto	41.914	13.423		NF	NF	NF
1225	IT_56059	Civita d'Antino	41.886	13.472		NF	NF	NF
1226	IT_56056	Celano	42.084	13.546		NF	NF	NF
1227	IT_56052	Castelvecchio Subequo	42.13	13.731		NF	NF	NF
1228	IT_56045	Castel del Monte	42.364	13.726		NF	NF	NF
1229	IT_56036	Carsoli	42.098	13.084		NF	NF	NF
1230	IT_56032	Cappadocia	42.006	13.282		NF	NF	NF
1231	IT_56018	Capistrello	41.966	13.39		NF	NF	NF
1232	IT_56008	Canistro (Inferiore)	41.941	13.411		NF	NF	NF
1233	IT_56003	Campotosto	42.559	13.368		NF	NF	NF
1234	IT_56002	Campo di Giove	42.011	14.044		NF	NF	NF
1235	IT_56001	Calascio	42.326	13.696		NF	NF	NF
1236	IT_55992	Cagnano Amiterno (San Cosimo)	42.458	13.232		NF	NF	NF
1237	IT_55987	Bugnara	42.022	13.862		NF	NF	NF
1238	IT_55978	Barisciano	42.325	13.592		NF	NF	NF
1239	IT_55973	Barete	42.449	13.282		NF	NF	NF
1240	IT_55952	Balsorano (Nuovo)	41.81	13.561		NF	NF	NF
1241	IT_55944	Avezzano	42.032	13.426		NF	NF	NF
1242	IT_55929	Anversa degli Abruzzi	41.994	13.804		NF	NF	NF
1243	IT_55925	Aielli	42.081	13.591		NF	NF	NF
1244	IT_55919	Acciano	42.176	13.717		NF	NF	NF
1245	IT_55915	Villa Santo Stefano	41.516	13.309		NF	NF	NF
1246	IT_55898	Vico nel Lazio	41.777	13.342		NF	NF	NF
1247	IT_55806	Vallecorsa	41.444	13.405		NF	NF	NF
1248	IT_55805	Trivigliano	41.775	13.273		NF	NF	NF
1249	IT_55800	Trevi nel Lazio	41.862	13.248		NF	NF	NF
1250	IT_55746	Strangolagalli	41.6	13.493		NF	NF	NF
1251	IT_55676	Sgurgola	41.67	13.149		NF	NF	NF
1252	IT_55675	Settefrati	41.67	13.85		NF	NF	NF
1253	IT_55647	Santopadre	41.603	13.634		NF	NF	NF
1254	IT_55629	Sant'Elia Fiumerapido	41.54	13.867		NF	NF	NF
1255	IT_55615	Sant'Apollinare	41.402	13.831		NF	NF	NF
1256	IT_55554	San Biagio Saracinisco	41.613	13.929		NF	NF	NF
1257	IT_55546	Roccasecca	41.552	13.668		NF	NF	NF
1258	IT_55501	Pofi	41.564	13.416		NF	NF	NF
1259	IT_55491	Piedimonte San Germano	41.496	13.749		NF	NF	NF
1260	IT_55480	Picinisco	41.645	13.868		NF	NF	NF
1261	IT_55465	Pescosolido	41.749	13.656		NF	NF	NF
1262	IT_55452	Patrica	41.591	13.244		NF	NF	NF
1263	IT_55415	Paliano	41.805	13.057		NF	NF	NF
1264	IT_55405	Morolo	41.637	13.197		NF	NF	NF
1265	IT_55316	Guarcino	41.799	13.314		NF	NF	NF
1266	IT_55315	Giuliano di Roma	41.538	13.28		NF	NF	NF
1267	IT_55302	Fumone	41.727	13.291		NF	NF	NF
1268	IT_55292	Frosinone	41.64	13.353		NF	NF	NF
1269	IT_55244	Fontechiari	41.669	13.675		NF	NF	NF
1270	IT_55205	Fontana Liri (Inferiore)	41.609	13.551		NF	NF	NF
1271	IT_55202	Fiuggi	41.802	13.224		NF	NF	NF
1272	IT_55200	Filettino	41.889	13.324		NF	NF	NF
1273	IT_55198	Ferentino	41.691	13.254		NF	NF	NF
1274	IT_55177	Esperia (Roccaguglielma)	41.384	13.68		NF	NF	NF
1275	IT_55174	Coreno Ausonio	41.345	13.779		NF	NF	NF
1276	IT_55115	Ceprano	41.545	13.517		NF	NF	NF
1277	IT_55110	Ceccano	41.568	13.334		NF	NF	NF
1278	IT_55100	Castro dei Volsci	41.509	13.406		NF	NF	NF
1279	IT_55093	Castrocielo	41.532	13.697		NF	NF	NF
1280	IT_55088	Castelnuovo Parano (Casali)	41.378	13.755		NF	NF	NF
1281	IT_54969	Casalvieri	41.631	13.712		NF	NF	NF
1282	IT_54938	Campoli Appennino	41.737	13.679		NF	NF	NF
1283	IT_54910	Boville Ernica	41.642	13.473		NF	NF	NF
1284	IT_54882	Ausonia	41.354	13.749		NF	NF	NF
1285	IT_54813	Arce	41.585	13.575		NF	NF	NF
1286	IT_54796	Aquino	41.493	13.7		NF	NF	NF
1287	IT_54792	Anagni	41.742	13.156		NF	NF	NF
1288	IT_54786	Amaseno	41.467	13.336		NF	NF	NF
1289	IT_54775	Alvito	41.689	13.743		NF	NF	NF
1290	IT_54764	Alatri	41.726	13.344		NF	NF	NF
1291	IT_54754	Acuto	41.791	13.176		NF	NF	NF
1292	IT_54749	Acquafondata	41.542	13.953		NF	NF	NF
1293	IT_54748	Ventotene	40.797	13.431		NF	NF	NF
1294	IT_54738	Terracina	41.288	13.233		NF	NF	NF
1295	IT_54716	Sonnino	41.413	13.246		NF	NF	NF
1296	IT_54682	Sermoneta	41.549	12.985		NF	NF	NF
1297	IT_54654	San Felice Circeo	41.232	13.09		NF	NF	NF
1298	IT_54635	Roccagorga	41.525	13.156		NF	NF	NF
1299	IT_54633	Prossedi	41.517	13.263		NF	NF	NF
1300	IT_54629	Priverno	41.473	13.181		NF	NF	NF
1301	IT_54623	Ponza	40.892	12.965		NF	NF	NF
1302	IT_54620	Pontinia	41.408	13.044		NF	NF	NF
1303	IT_54617	Norma	41.584	12.972		NF	NF	NF
1304	IT_54612	Monte San Biagio	41.353	13.352		NF	NF	NF
1305	IT_54584	Maenza	41.522	13.18		NF	NF	NF
1306	IT_54571	Latina	41.467	12.904		NF	NF	NF
1307	IT_54541	Itri	41.29	13.532		NF	NF	NF
1308	IT_54533	Formia	41.257	13.608		NF	NF	NF
1309	IT_54520	Cori	41.642	12.916		NF	NF	NF
1310	IT_54515	Cisterna di Latina	41.591	12.83		NF	NF	NF
1311	IT_54505	Castelforte	41.3	13.822		NF	NF	NF
1312	IT_54503	Campodimele	41.39	13.53		NF	NF	NF
1313	IT_54501	Bassiano	41.549	13.032		NF	NF	NF
1314	IT_54475	Vicovaro	42.017	12.896		NF	NF	NF
1315	IT_54461	Valmontone	41.775	12.919		NF	NF	NF
1316	IT_54459	Vallinfreda	42.084	12.995		NF	NF	NF
1317	IT_54445	Tivoli	41.964	12.798		NF	NF	NF
1318	IT_54435	Subiaco	41.925	13.095		NF	NF	NF
1319	IT_54432	Segni	41.69	13.022		NF	NF	NF
1320	IT_54419	San Vito Romano	41.881	12.98		NF	NF	NF
1321	IT_54405	San Polo dei Cavalieri	42.01	12.84		NF	NF	NF
1322	IT_54403	San Gregorio da Sassola	41.918	12.871		NF	NF	NF
1323	IT_54402	Sambuci	41.987	12.937		NF	NF	NF
1324	IT_54023	Rocca Santo Stefano	41.91	13.024		NF	NF	NF
1325	IT_54021	Rocca Priora	41.79	12.755		NF	NF	NF
1326	IT_54017	Rocca di Papa	41.76	12.71		NF	NF	NF
1327	IT_54008	Rocca Canterano	41.956	13.022		NF	NF	NF
1328	IT_54007	Riofreddo	42.06	13		NF	NF	NF
1329	IT_53978	Poli	41.887	12.892		NF	NF	NF
1330	IT_53977	Pisoniano	41.906	12.959		NF	NF	NF
1331	IT_53961	Olevano Romano	41.86	13.033		NF	NF	NF
1332	IT_53950	Nettuno	41.459	12.663		NF	NF	NF
1333	IT_53946	Nerola	42.16	12.787		NF	NF	NF
1334	IT_53930	Moricone	42.117	12.771		NF	NF	NF
1335	IT_53928	Montorio Romano	42.139	12.807		NF	NF	NF
1336	IT_53889	Monteflavio	42.108	12.831		NF	NF	NF
1337	IT_53885	Montecompatri	41.807	12.736		NF	NF	NF
1338	IT_53861	Marcellina	42.023	12.806		NF	NF	NF
1339	IT_53832	Labico	41.785	12.885		NF	NF	NF
1340	IT_53831	Jenne	41.887	13.169		NF	NF	NF
1341	IT_53800	Grottaferrata	41.787	12.677		NF	NF	NF
1342	IT_53798	Gorga	41.655	13.11		NF	NF	NF
1343	IT_53797	Gerano	41.933	12.994		NF	NF	NF
1344	IT_53793	Genzano di Roma	41.707	12.688		NF	NF	NF
1345	IT_53791	Genazzano	41.833	12.973		NF	NF	NF
1346	IT_53786	Gavignano	41.698	13.052		NF	NF	NF
1347	IT_53784	Gallicano nel Lazio	41.871	12.819		NF	NF	NF
1348	IT_53767	Colonna	41.835	12.752		NF	NF	NF
1349	IT_53764	Colleferro	41.73	13.006		NF	NF	NF
1350	IT_53752	Ciciliano	41.961	12.941		NF	NF	NF
1351	IT_53738	Cave	41.818	12.931		NF	NF	NF
1352	IT_53730	Castel Madama	41.974	12.868		NF	NF	NF
1353	IT_53717	Casape	41.906	12.886		NF	NF	NF
1354	IT_53716	Carpineto Romano	41.605	13.084		NF	NF	NF
1355	IT_53714	Capranica Prenestina	41.862	12.952		NF	NF	NF
1356	IT_53699	Camerata Nuova	42.018	13.108		NF	NF	NF
1357	IT_53683	Bellegra	41.884	13.027		NF	NF	NF
1358	IT_53675	Artena	41.74	12.912		NF	NF	NF
1359	IT_53618	Arcinazzo Romano	41.881	13.115		NF	NF	NF
1360	IT_53608	Anzio	41.451	12.628		NF	NF	NF
1361	IT_53607	Anticoli Corrado	42.01	12.989		NF	NF	NF
1362	IT_53594	Albano Laziale	41.728	12.659		NF	NF	NF
1363	IT_53589	Agosta	41.981	13.033		NF	NF	NF
1364	IT_53577	Turania	42.137	13.009		NF	NF	NF
1365	IT_53571	Torricella in Sabina	42.261	12.871		NF	NF	NF
1366	IT_53544	Rocca Sinibalda	42.275	12.927		NF	NF	NF
1367	IT_53497	Pozzaglia Sabina	42.158	12.964		NF	NF	NF
1368	IT_53484	Posta	42.524	13.097		NF	NF	NF
1369	IT_53483	Poggio San Lorenzo	42.252	12.844		NF	NF	NF
1370	IT_53477	Poggio Moiano	42.201	12.878		NF	NF	NF
1371	IT_53455	Petrella Salto	42.294	13.068		NF	NF	NF
1372	IT_53433	Pescorocchiano	42.206	13.148		NF	NF	NF
1373	IT_53418	Orvinio	42.131	12.939		NF	NF	NF
1374	IT_53368	Marcetelli	42.226	13.046		NF	NF	NF
1375	IT_53216	Colle di Tora	42.212	12.948		NF	NF	NF
1376	IT_53139	Borgo Velino	42.405	13.059		NF	NF	NF
1377	IT_53124	Borgorose	42.193	13.234		NF	NF	NF
1378	IT_53118	Borbona	42.512	13.137		NF	NF	NF
1379	IT_53112	Belmonte in Sabina	42.316	12.892		NF	NF	NF
1380	IT_53108	Ascrea	42.196	12.997		NF	NF	NF
1381	IT_52773	Spinetoli	42.888	13.773		NF	NF	NF
1382	IT_52745	San Benedetto del Tronto	42.955	13.88		NF	NF	NF
1383	IT_52540	Monsampolo del Tronto	42.898	13.794		NF	NF	NF
1384	IT_52368	Castel di Lama (Villa Piattoni)	42.873	13.707		NF	NF	NF
1385	IT_52305	Ascoli Piceno	42.855	13.576		NF	NF	NF
1386	IT_52290	Appignano del Tronto	42.899	13.666		NF	NF	NF
19	IT_78996	Abetina	40.499	16.096			SD	SD
20	IT_71200	Abbazia di San Michele a Monticchio	40.936	15.617			SD	SD
21	IT_62866	Bancone di Sopra	40.711	15.75			SD	SD
415	IT_60736	Grottolella	40.972	14.787			4-5	4-5
609	IT_62449	Marina di Ginosa	40.428	16.89			4	4
610	IT_62206	Foresta Umbra	41.817	15.992			4	4
611	IT_61001	San Michele di Serino	40.877	14.857			4	4
853	IT_62778	Racale	39.96	18.094			3	3
854	IT_62720	Lecce	40.353	18.172			3	3
898	IT_56279	Pescasseroli	41.808	13.789			2	2
921	IT_60009	Casalnuovo di Napoli	40.91	14.343			NC	NC
1387	IT_64519	Andali	39.013	16.77			NF	NF
1388	IT_64490	Magli	39.278	16.312			NF	NF
1389	IT_64200	Lorica	39.252	16.51			NF	NF
1390	IT_58856	Tufara	41.482	14.948			NF	NF
1391	IT_58213	Treglio	42.267	14.425			NF	NF
1392	IT_56444	Ancarano	42.837	13.742			NF	NF
1393	IT_54822	Arnara	41.584	13.389			NF	NF

## Sheet: Format
N	Record number
PlaceID	Locality ID
PlaceName	Locality Name
Lat	Latitude (WGS84)
Lon	Longitude (WGS84)
Int TERAL [MCS]	Intensity as reported by Tertulliani et al. (1992)
Int BMING [MCS]	Intensity as reported by Gasparini et al. (1991)
Int This Study [MCS]	Intensity in the MCS scale of this study
Int This Study [EMS-98]	Intensity in the EMS-98 scale of this study
